# Supplementary material for: Deep sequencing of short capped RNAs reveals novel families of noncoding RNAs
Source: PubMed Central journal article supplement (PMC9528987; doi:10.1101/gr.276647.122), 2022-09
Supplement: supp_gr.276647.122_Supplemental_Fig_S2.pdf [file supp_gr.276647.122_Supplemental_Fig_S2.pdf]

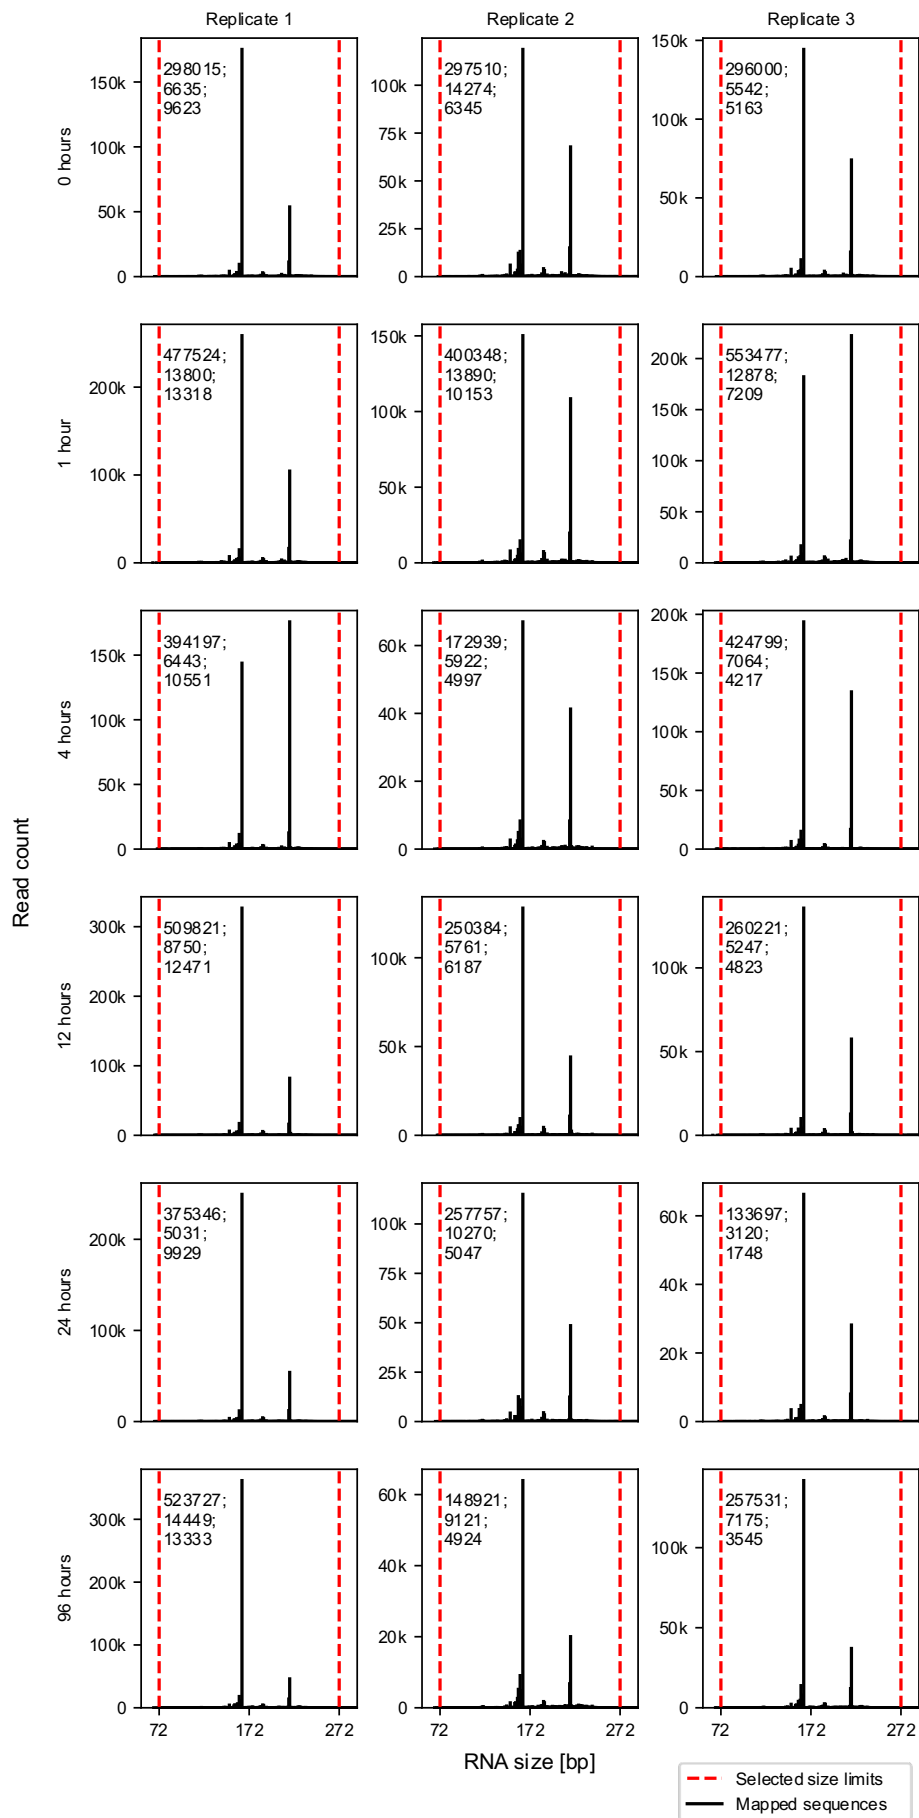

**Supplementary Figure S2.**

Distribution of RNA sizes inferred from the paired-end sequencing data of short capped RNAs. The total number of mapped sequences, the number of mapped sequences with inferred RNA sizes outside of the window shown, and the number of unmapped sequences are indicated in each panel.
