# Supplementary material for: Deep sequencing of short capped RNAs reveals novel families of noncoding RNAs
Source: PubMed Central journal article supplement (PMC9528987; doi:10.1101/gr.276647.122), 2022-09
Supplement: supp_gr.276647.122_Supplemental_Fig_S7.pdf [file supp_gr.276647.122_Supplemental_Fig_S7.pdf]

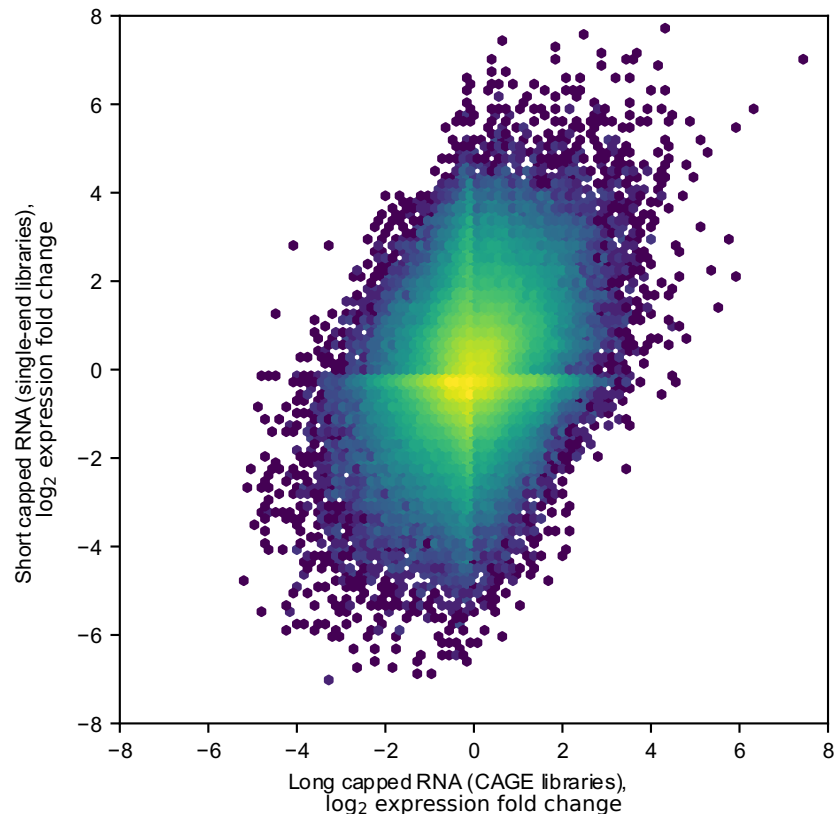

**Supplementary Figure S7.** Differential expression of long capped RNAs (as observed in the CAGE libraries) during the time course, and differential expression of short capped RNAs (as observed in the single-end libraries) originating from the same gene-associated transcription initiation peak. Log<sub>2</sub> expression fold changes were calculated using the variance stabilizing transformation (see Methods).
