# Supplementary material for: Deep sequencing of short capped RNAs reveals novel families of noncoding RNAs
Source: PubMed Central journal article supplement (PMC9528987; doi:10.1101/gr.276647.122), 2022-09
Supplement: supp_gr.276647.122_Supplemental_Fig_S8.pdf [file supp_gr.276647.122_Supplemental_Fig_S8.pdf]

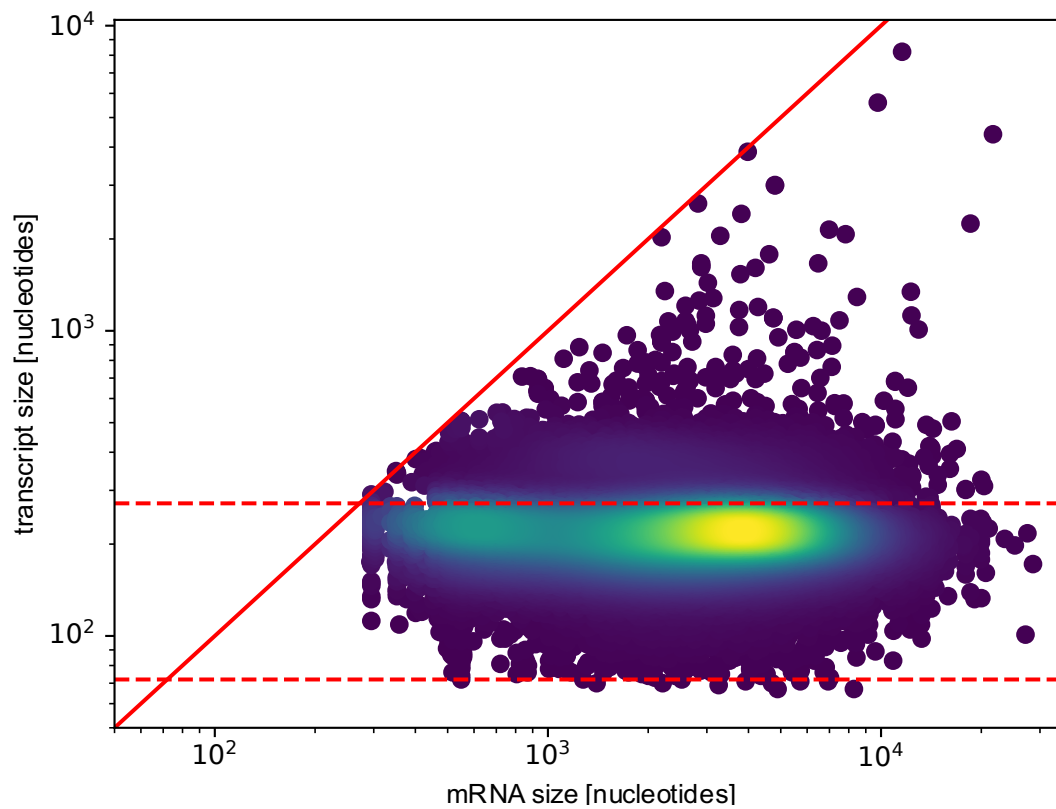

**Supplementary Figure S8A.** Transcript size of short capped RNAs aligning to mature mRNA transcripts versus the size of the mRNA transcript, colored by local density, using the paired-end sequencing data. The peak consists of transcripts aligning to mature lncRNA transcripts, but with a premature 3' end (see **Figure 3A**). Dashed red lines indicate the transcript sizes that were selected by library size selection. The solid red line is the identity line.

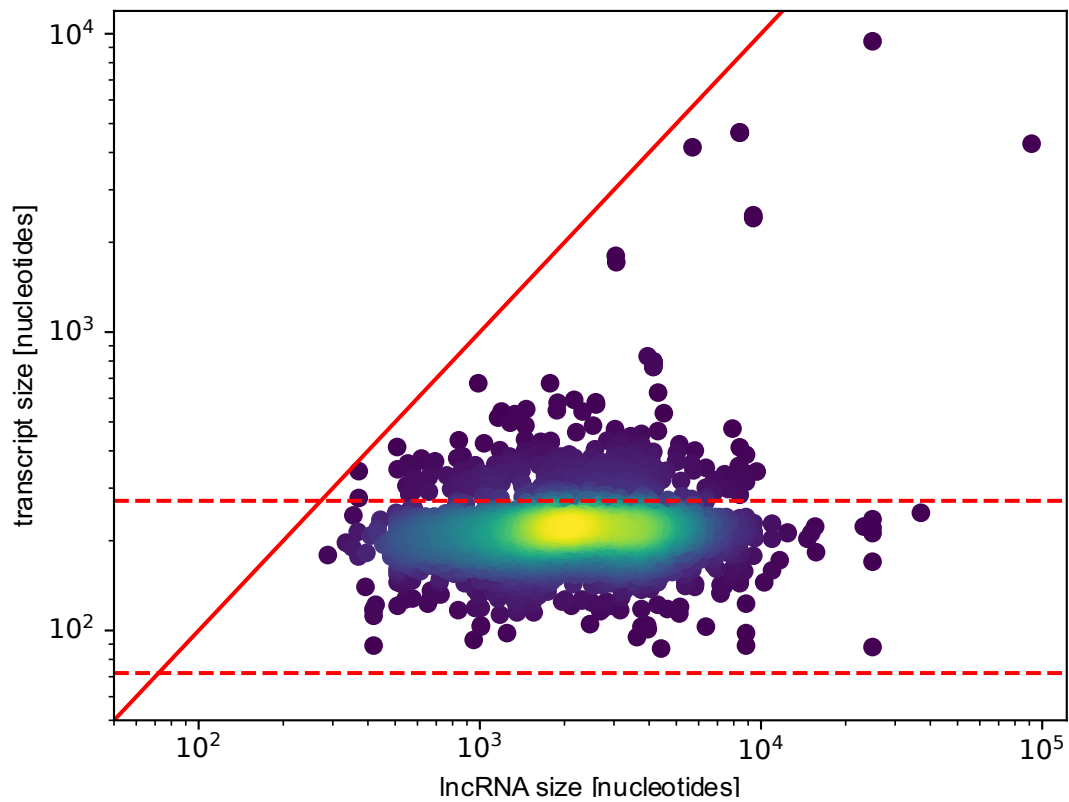

**Supplementary Figure S8B.** Transcript size of short capped RNAs aligning to mature lncRNA transcripts versus the size of the lncRNA transcript, colored by local density, using the paired-end sequencing data. The peak consists of transcripts aligning to mature lncRNA transcripts, but with a premature 3' end (see **Figure 3B**). Dashed red lines indicate the transcript sizes that were selected by cDNA size selection. The solid red line is the identity line.
