# Supplementary material for: Deep sequencing of short capped RNAs reveals novel families of noncoding RNAs
Source: PubMed Central journal article supplement (PMC9528987; doi:10.1101/gr.276647.122), 2022-09
Supplement: supp_gr.276647.122_Supplemental_Fig_S10.pdf [file supp_gr.276647.122_Supplemental_Fig_S10.pdf]

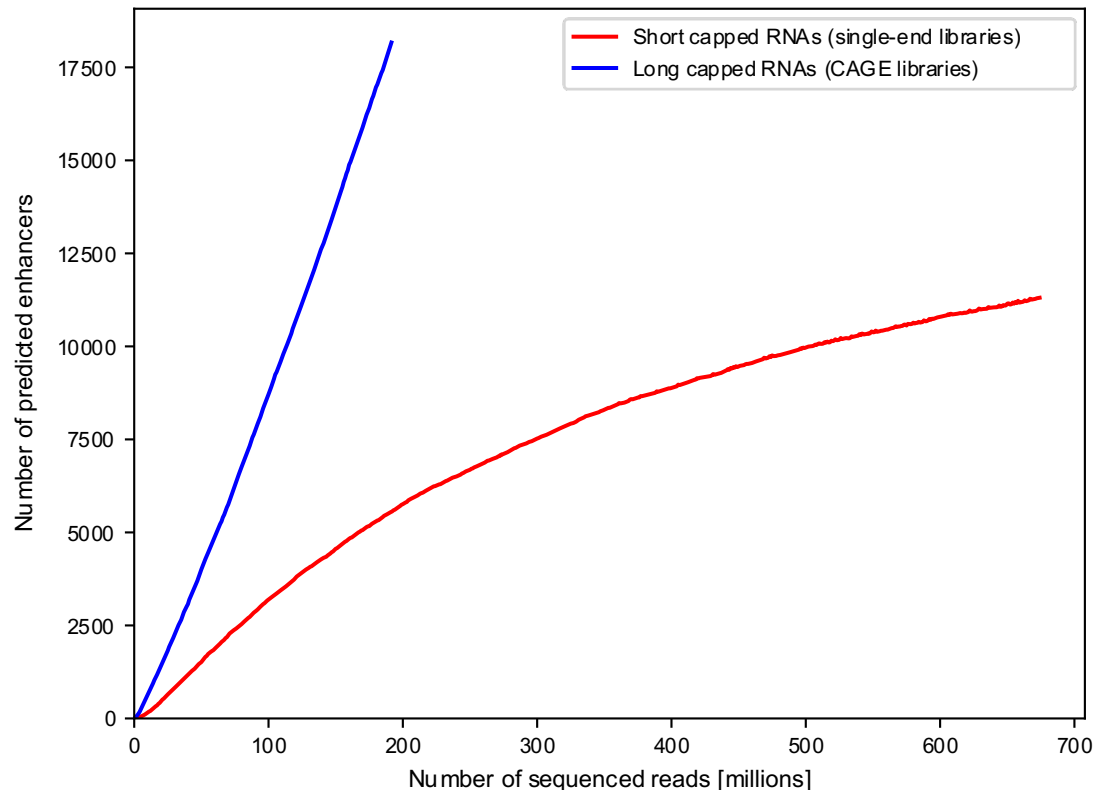

**Supplementary Figure S10.** Number of predicted enhancers as a function of sequencing depth. Both for short capped RNAs (single-end libraries) and long capped RNAs (CAGE libraries), enhancer prediction has not reached saturation.
