# Supplementary material for: Deep sequencing of short capped RNAs reveals novel families of noncoding RNAs
Source: Genome Res. 2022 Sep;32(9):1727–35. doi: 10.1101/gr.276647.122 (PMC9528987; doi:10.1101/gr.276647.122)
Supplement: Supplemental Material [file supp_gr.276647.122_Supplemental_Table_S1.xlsx]

## Sheet: README
Sheet TableS1 contains a list of annotated non-coding RNAs with their NCBI RefSeq accession number or Ensembl transcript ID, the category each RNA was assigned to, and its biogenesis (either "Pol-I", "Pol-II", "Pol-III" for transcripts produced by RNA polymerase I, II, or III, respectively, or "intronic" for non-coding RNAs produced by excision from intronic sequences).

## Sheet: TableS1
Accession	Category	Biogenesis
NR_145819.1	rRNA	Pol-I
NR_145822.1	rRNA	Pol-I
NR_145821.1	rRNA	Pol-I
NR_146154.1	rRNA	Pol-I
NR_146153.1	rRNA	Pol-I
NR_146151.1	rRNA	Pol-I
NR_145820.1	rRNA	Pol-I
NR_146119.1	rRNA	Pol-I
NR_146120.1	rRNA	Pol-I
NR_146117.1	rRNA	Pol-I
NR_146118.1	rRNA	Pol-I
NR_146152.1	rRNA	Pol-I
NR_003285.3	rRNA	Pol-I
NR_003286.4	rRNA	Pol-I
NR_046235.3	rRNA	Pol-I
NR_003287.4	rRNA	Pol-I
NR_146147.1	rRNA	Pol-I
NR_146144.1	rRNA	Pol-I
NR_146148.1	rRNA	Pol-I
NR_146146.1	rRNA	Pol-I
NR_023370.1	rRNA	Pol-III
NR_023367.1	rRNA	Pol-III
NR_023363.1	rRNA	Pol-III
NR_023368.1	rRNA	Pol-III
NR_023373.1	rRNA	Pol-III
NR_023374.1	rRNA	Pol-III
NR_023365.1	rRNA	Pol-III
NR_023379.1	rRNA	Pol-III
NR_023366.1	rRNA	Pol-III
NR_023364.1	rRNA	Pol-III
NR_023372.1	rRNA	Pol-III
NR_023371.1	rRNA	Pol-III
NR_023378.1	rRNA	Pol-III
NR_023376.1	rRNA	Pol-III
NR_023375.1	rRNA	Pol-III
NR_023377.1	rRNA	Pol-III
NR_023369.1	rRNA	Pol-III
NR_001445.2	7SK	Pol-III
NR_004400.1	U1 spliceosomal RNA	Pol-II
NR_004408.1	U1 spliceosomal RNA	Pol-II
NR_004421.1	U1 spliceosomal RNA	Pol-II
NR_004426.2	U1 spliceosomal RNA	Pol-II
NR_004427.1	U1 spliceosomal RNA	Pol-II
NR_004430.2	U1 spliceosomal RNA	Pol-II
NR_104073.1	U1 spliceosomal RNA	Pol-II
NR_104075.1	U1 spliceosomal RNA	Pol-II
NR_104076.1	U1 spliceosomal RNA	Pol-II
NR_104078.1	U1 spliceosomal RNA	Pol-II
NR_104081.1	U1 spliceosomal RNA	Pol-II
NR_104082.1	U1 spliceosomal RNA	Pol-II
NR_104085.1	U1 spliceosomal RNA	Pol-II
NR_104086.2	U1 spliceosomal RNA	Pol-II
NR_121645.1	U1 spliceosomal RNA	Pol-II
NR_125392.1	U1 spliceosomal RNA	Pol-II
NR_145576.1	U1 spliceosomal RNA	Pol-II
ENST00000347264.2	U1 spliceosomal RNA	Pol-II
ENST00000353977.2	U1 spliceosomal RNA	Pol-II
ENST00000362413.1	U1 spliceosomal RNA	Pol-II
ENST00000362491.1	U1 spliceosomal RNA	Pol-II
ENST00000362556.1	U1 spliceosomal RNA	Pol-II
ENST00000362599.1	U1 spliceosomal RNA	Pol-II
ENST00000362618.1	U1 spliceosomal RNA	Pol-II
ENST00000362627.1	U1 spliceosomal RNA	Pol-II
ENST00000362684.1	U1 spliceosomal RNA	Pol-II
ENST00000362759.1	U1 spliceosomal RNA	Pol-II
ENST00000362782.2	U1 spliceosomal RNA	Pol-II
ENST00000362817.1	U1 spliceosomal RNA	Pol-II
ENST00000362903.1	U1 spliceosomal RNA	Pol-II
ENST00000362935.1	U1 spliceosomal RNA	Pol-II
ENST00000362966.1	U1 spliceosomal RNA	Pol-II
ENST00000362976.1	U1 spliceosomal RNA	Pol-II
ENST00000363009.1	U1 spliceosomal RNA	Pol-II
ENST00000363022.2	U1 spliceosomal RNA	Pol-II
ENST00000363062.1	U1 spliceosomal RNA	Pol-II
ENST00000363306.1	U1 spliceosomal RNA	Pol-II
ENST00000363314.1	U1 spliceosomal RNA	Pol-II
ENST00000363327.1	U1 spliceosomal RNA	Pol-II
ENST00000363334.1	U1 spliceosomal RNA	Pol-II
ENST00000363361.1	U1 spliceosomal RNA	Pol-II
ENST00000363426.1	U1 spliceosomal RNA	Pol-II
ENST00000363468.1	U1 spliceosomal RNA	Pol-II
ENST00000363470.1	U1 spliceosomal RNA	Pol-II
ENST00000363727.1	U1 spliceosomal RNA	Pol-II
ENST00000363861.1	U1 spliceosomal RNA	Pol-II
ENST00000363875.1	U1 spliceosomal RNA	Pol-II
ENST00000363919.1	U1 spliceosomal RNA	Pol-II
ENST00000363930.1	U1 spliceosomal RNA	Pol-II
ENST00000363937.1	U1 spliceosomal RNA	Pol-II
ENST00000364015.1	U1 spliceosomal RNA	Pol-II
ENST00000364033.1	U1 spliceosomal RNA	Pol-II
ENST00000364105.1	U1 spliceosomal RNA	Pol-II
ENST00000364127.1	U1 spliceosomal RNA	Pol-II
ENST00000364163.1	U1 spliceosomal RNA	Pol-II
ENST00000364249.1	U1 spliceosomal RNA	Pol-II
ENST00000364272.1	U1 spliceosomal RNA	Pol-II
ENST00000364285.1	U1 spliceosomal RNA	Pol-II
ENST00000364300.1	U1 spliceosomal RNA	Pol-II
ENST00000364401.1	U1 spliceosomal RNA	Pol-II
ENST00000364421.1	U1 spliceosomal RNA	Pol-II
ENST00000364623.1	U1 spliceosomal RNA	Pol-II
ENST00000364704.1	U1 spliceosomal RNA	Pol-II
ENST00000364746.1	U1 spliceosomal RNA	Pol-II
ENST00000364829.1	U1 spliceosomal RNA	Pol-II
ENST00000364867.1	U1 spliceosomal RNA	Pol-II
ENST00000365040.1	U1 spliceosomal RNA	Pol-II
ENST00000365052.1	U1 spliceosomal RNA	Pol-II
ENST00000365130.1	U1 spliceosomal RNA	Pol-II
ENST00000365255.1	U1 spliceosomal RNA	Pol-II
ENST00000365297.1	U1 spliceosomal RNA	Pol-II
ENST00000365329.1	U1 spliceosomal RNA	Pol-II
ENST00000365345.1	U1 spliceosomal RNA	Pol-II
ENST00000365443.1	U1 spliceosomal RNA	Pol-II
ENST00000365447.1	U1 spliceosomal RNA	Pol-II
ENST00000365477.1	U1 spliceosomal RNA	Pol-II
ENST00000365510.1	U1 spliceosomal RNA	Pol-II
ENST00000365538.2	U1 spliceosomal RNA	Pol-II
ENST00000383861.1	U1 spliceosomal RNA	Pol-II
ENST00000383869.1	U1 spliceosomal RNA	Pol-II
ENST00000383897.1	U1 spliceosomal RNA	Pol-II
ENST00000383902.1	U1 spliceosomal RNA	Pol-II
ENST00000383960.1	U1 spliceosomal RNA	Pol-II
ENST00000383971.1	U1 spliceosomal RNA	Pol-II
ENST00000383975.1	U1 spliceosomal RNA	Pol-II
ENST00000384064.1	U1 spliceosomal RNA	Pol-II
ENST00000384093.1	U1 spliceosomal RNA	Pol-II
ENST00000384101.1	U1 spliceosomal RNA	Pol-II
ENST00000384108.1	U1 spliceosomal RNA	Pol-II
ENST00000384181.1	U1 spliceosomal RNA	Pol-II
ENST00000384190.1	U1 spliceosomal RNA	Pol-II
ENST00000384328.1	U1 spliceosomal RNA	Pol-II
ENST00000384382.1	U1 spliceosomal RNA	Pol-II
ENST00000384425.1	U1 spliceosomal RNA	Pol-II
ENST00000384446.1	U1 spliceosomal RNA	Pol-II
ENST00000384453.1	U1 spliceosomal RNA	Pol-II
ENST00000384472.1	U1 spliceosomal RNA	Pol-II
ENST00000384491.1	U1 spliceosomal RNA	Pol-II
ENST00000384499.1	U1 spliceosomal RNA	Pol-II
ENST00000384592.1	U1 spliceosomal RNA	Pol-II
ENST00000390851.1	U1 spliceosomal RNA	Pol-II
ENST00000390868.1	U1 spliceosomal RNA	Pol-II
ENST00000390870.1	U1 spliceosomal RNA	Pol-II
ENST00000391122.1	U1 spliceosomal RNA	Pol-II
ENST00000391171.1	U1 spliceosomal RNA	Pol-II
ENST00000391248.1	U1 spliceosomal RNA	Pol-II
ENST00000391303.1	U1 spliceosomal RNA	Pol-II
ENST00000391307.1	U1 spliceosomal RNA	Pol-II
ENST00000458943.1	U1 spliceosomal RNA	Pol-II
ENST00000458950.1	U1 spliceosomal RNA	Pol-II
ENST00000458992.1	U1 spliceosomal RNA	Pol-II
ENST00000459274.1	U1 spliceosomal RNA	Pol-II
ENST00000459500.1	U1 spliceosomal RNA	Pol-II
ENST00000516107.1	U1 spliceosomal RNA	Pol-II
ENST00000516108.1	U1 spliceosomal RNA	Pol-II
ENST00000516161.1	U1 spliceosomal RNA	Pol-II
ENST00000516290.1	U1 spliceosomal RNA	Pol-II
ENST00000516296.1	U1 spliceosomal RNA	Pol-II
ENST00000516326.1	U1 spliceosomal RNA	Pol-II
ENST00000516357.1	U1 spliceosomal RNA	Pol-II
ENST00000516400.1	U1 spliceosomal RNA	Pol-II
ENST00000516502.1	U1 spliceosomal RNA	Pol-II
ENST00000516617.1	U1 spliceosomal RNA	Pol-II
ENST00000516682.1	U1 spliceosomal RNA	Pol-II
ENST00000516704.1	U1 spliceosomal RNA	Pol-II
ENST00000516752.1	U1 spliceosomal RNA	Pol-II
ENST00000516816.1	U1 spliceosomal RNA	Pol-II
ENST00000516872.1	U1 spliceosomal RNA	Pol-II
ENST00000517017.1	U1 spliceosomal RNA	Pol-II
ENST00000517041.1	U1 spliceosomal RNA	Pol-II
ENST00000517181.1	U1 spliceosomal RNA	Pol-II
ENST00000517191.1	U1 spliceosomal RNA	Pol-II
ENST00000517280.1	U1 spliceosomal RNA	Pol-II
ENST00000572849.1	U1 spliceosomal RNA	Pol-II
ENST00000577618.1	U1 spliceosomal RNA	Pol-II
ENST00000577825.1	U1 spliceosomal RNA	Pol-II
ENST00000578081.1	U1 spliceosomal RNA	Pol-II
ENST00000578102.1	U1 spliceosomal RNA	Pol-II
ENST00000578508.1	U1 spliceosomal RNA	Pol-II
ENST00000579167.1	U1 spliceosomal RNA	Pol-II
ENST00000579513.1	U1 spliceosomal RNA	Pol-II
ENST00000579987.1	U1 spliceosomal RNA	Pol-II
ENST00000580213.1	U1 spliceosomal RNA	Pol-II
ENST00000580281.1	U1 spliceosomal RNA	Pol-II
ENST00000580475.1	U1 spliceosomal RNA	Pol-II
ENST00000580816.1	U1 spliceosomal RNA	Pol-II
ENST00000581325.1	U1 spliceosomal RNA	Pol-II
ENST00000581688.1	U1 spliceosomal RNA	Pol-II
ENST00000582199.1	U1 spliceosomal RNA	Pol-II
ENST00000582426.1	U1 spliceosomal RNA	Pol-II
ENST00000583575.1	U1 spliceosomal RNA	Pol-II
ENST00000583936.1	U1 spliceosomal RNA	Pol-II
ENST00000584018.1	U1 spliceosomal RNA	Pol-II
ENST00000584937.1	U1 spliceosomal RNA	Pol-II
ENST00000585125.1	U1 spliceosomal RNA	Pol-II
ENST00000605806.1	U1 spliceosomal RNA	Pol-II
ENST00000606574.1	U1 spliceosomal RNA	Pol-II
ENST00000606575.1	U1 spliceosomal RNA	Pol-II
ENST00000610293.1	U1 spliceosomal RNA	Pol-II
ENST00000610702.1	U1 spliceosomal RNA	Pol-II
ENST00000610976.1	U1 spliceosomal RNA	Pol-II
ENST00000611407.1	U1 spliceosomal RNA	Pol-II
ENST00000611896.1	U1 spliceosomal RNA	Pol-II
ENST00000612437.1	U1 spliceosomal RNA	Pol-II
ENST00000612925.1	U1 spliceosomal RNA	Pol-II
ENST00000614085.1	U1 spliceosomal RNA	Pol-II
ENST00000614774.1	U1 spliceosomal RNA	Pol-II
ENST00000615382.1	U1 spliceosomal RNA	Pol-II
ENST00000615842.1	U1 spliceosomal RNA	Pol-II
ENST00000618083.1	U1 spliceosomal RNA	Pol-II
ENST00000618578.1	U1 spliceosomal RNA	Pol-II
ENST00000619058.1	U1 spliceosomal RNA	Pol-II
ENST00000619109.1	U1 spliceosomal RNA	Pol-II
ENST00000619524.1	U1 spliceosomal RNA	Pol-II
ENST00000620022.1	U1 spliceosomal RNA	Pol-II
ENST00000620684.1	U1 spliceosomal RNA	Pol-II
ENST00000621107.1	U1 spliceosomal RNA	Pol-II
ENST00000621562.1	U1 spliceosomal RNA	Pol-II
ENST00000622285.1	U1 spliceosomal RNA	Pol-II
ENST00000627793.1	U1 spliceosomal RNA	Pol-II
NR_002716.3	U2 spliceosomal RNA	Pol-II
ENST00000410144.1	U2 spliceosomal RNA	Pol-II
ENST00000410162.1	U2 spliceosomal RNA	Pol-II
ENST00000410194.1	U2 spliceosomal RNA	Pol-II
ENST00000410290.1	U2 spliceosomal RNA	Pol-II
ENST00000410299.1	U2 spliceosomal RNA	Pol-II
ENST00000410306.1	U2 spliceosomal RNA	Pol-II
ENST00000410344.1	U2 spliceosomal RNA	Pol-II
ENST00000410361.1	U2 spliceosomal RNA	Pol-II
ENST00000410368.1	U2 spliceosomal RNA	Pol-II
ENST00000410396.1	U2 spliceosomal RNA	Pol-II
ENST00000410423.1	U2 spliceosomal RNA	Pol-II
ENST00000410425.1	U2 spliceosomal RNA	Pol-II
ENST00000410457.1	U2 spliceosomal RNA	Pol-II
ENST00000410482.1	U2 spliceosomal RNA	Pol-II
ENST00000410494.1	U2 spliceosomal RNA	Pol-II
ENST00000410508.1	U2 spliceosomal RNA	Pol-II
ENST00000410533.1	U2 spliceosomal RNA	Pol-II
ENST00000410545.1	U2 spliceosomal RNA	Pol-II
ENST00000410604.1	U2 spliceosomal RNA	Pol-II
ENST00000410649.1	U2 spliceosomal RNA	Pol-II
ENST00000410650.1	U2 spliceosomal RNA	Pol-II
ENST00000410666.1	U2 spliceosomal RNA	Pol-II
ENST00000410680.1	U2 spliceosomal RNA	Pol-II
ENST00000410692.1	U2 spliceosomal RNA	Pol-II
ENST00000410694.1	U2 spliceosomal RNA	Pol-II
ENST00000410695.1	U2 spliceosomal RNA	Pol-II
ENST00000410697.1	U2 spliceosomal RNA	Pol-II
ENST00000410708.1	U2 spliceosomal RNA	Pol-II
ENST00000410712.1	U2 spliceosomal RNA	Pol-II
ENST00000410718.1	U2 spliceosomal RNA	Pol-II
ENST00000410727.1	U2 spliceosomal RNA	Pol-II
ENST00000410792.1	U2 spliceosomal RNA	Pol-II
ENST00000410794.1	U2 spliceosomal RNA	Pol-II
ENST00000410833.1	U2 spliceosomal RNA	Pol-II
ENST00000410856.1	U2 spliceosomal RNA	Pol-II
ENST00000410868.1	U2 spliceosomal RNA	Pol-II
ENST00000410878.1	U2 spliceosomal RNA	Pol-II
ENST00000410991.1	U2 spliceosomal RNA	Pol-II
ENST00000411041.1	U2 spliceosomal RNA	Pol-II
ENST00000411053.1	U2 spliceosomal RNA	Pol-II
ENST00000411069.1	U2 spliceosomal RNA	Pol-II
ENST00000411146.1	U2 spliceosomal RNA	Pol-II
ENST00000411175.1	U2 spliceosomal RNA	Pol-II
ENST00000411193.1	U2 spliceosomal RNA	Pol-II
ENST00000411224.1	U2 spliceosomal RNA	Pol-II
ENST00000411266.1	U2 spliceosomal RNA	Pol-II
ENST00000411315.1	U2 spliceosomal RNA	Pol-II
ENST00000411395.1	U2 spliceosomal RNA	Pol-II
ENST00000411404.1	U2 spliceosomal RNA	Pol-II
ENST00000459191.1	U2 spliceosomal RNA	Pol-II
ENST00000515909.1	U2 spliceosomal RNA	Pol-II
ENST00000516061.1	U2 spliceosomal RNA	Pol-II
ENST00000516068.1	U2 spliceosomal RNA	Pol-II
ENST00000516185.1	U2 spliceosomal RNA	Pol-II
ENST00000516209.1	U2 spliceosomal RNA	Pol-II
ENST00000516257.1	U2 spliceosomal RNA	Pol-II
ENST00000516375.1	U2 spliceosomal RNA	Pol-II
ENST00000516403.1	U2 spliceosomal RNA	Pol-II
ENST00000516446.1	U2 spliceosomal RNA	Pol-II
ENST00000516534.1	U2 spliceosomal RNA	Pol-II
ENST00000516659.1	U2 spliceosomal RNA	Pol-II
ENST00000516795.1	U2 spliceosomal RNA	Pol-II
ENST00000516826.1	U2 spliceosomal RNA	Pol-II
ENST00000516830.1	U2 spliceosomal RNA	Pol-II
ENST00000516954.1	U2 spliceosomal RNA	Pol-II
ENST00000517038.1	U2 spliceosomal RNA	Pol-II
ENST00000517216.1	U2 spliceosomal RNA	Pol-II
ENST00000517288.1	U2 spliceosomal RNA	Pol-II
ENST00000517290.1	U2 spliceosomal RNA	Pol-II
ENST00000606190.1	U2 spliceosomal RNA	Pol-II
ENST00000611062.1	U2 spliceosomal RNA	Pol-II
ENST00000611454.1	U2 spliceosomal RNA	Pol-II
ENST00000611544.1	U2 spliceosomal RNA	Pol-II
ENST00000613119.1	U2 spliceosomal RNA	Pol-II
ENST00000613778.1	U2 spliceosomal RNA	Pol-II
ENST00000613956.1	U2 spliceosomal RNA	Pol-II
ENST00000614083.1	U2 spliceosomal RNA	Pol-II
ENST00000615427.1	U2 spliceosomal RNA	Pol-II
ENST00000615943.1	U2 spliceosomal RNA	Pol-II
ENST00000616345.1	U2 spliceosomal RNA	Pol-II
ENST00000616535.1	U2 spliceosomal RNA	Pol-II
ENST00000617785.1	U2 spliceosomal RNA	Pol-II
ENST00000618602.1	U2 spliceosomal RNA	Pol-II
ENST00000618978.1	U2 spliceosomal RNA	Pol-II
ENST00000619197.1	U2 spliceosomal RNA	Pol-II
ENST00000619225.1	U2 spliceosomal RNA	Pol-II
ENST00000619465.1	U2 spliceosomal RNA	Pol-II
ENST00000620268.1	U2 spliceosomal RNA	Pol-II
ENST00000621409.1	U2 spliceosomal RNA	Pol-II
ENST00000622185.1	U2 spliceosomal RNA	Pol-II
ENST00000636441.1	U2 spliceosomal RNA	Pol-II
ENST00000637295.1	U2 spliceosomal RNA	Pol-II
NR_003137.2	U4 spliceosomal RNA	Pol-II
NR_003925.1	U4 spliceosomal RNA	Pol-II
ENST00000362443.1	U4 spliceosomal RNA	Pol-II
ENST00000362455.1	U4 spliceosomal RNA	Pol-II
ENST00000362588.1	U4 spliceosomal RNA	Pol-II
ENST00000362613.1	U4 spliceosomal RNA	Pol-II
ENST00000362764.1	U4 spliceosomal RNA	Pol-II
ENST00000362773.1	U4 spliceosomal RNA	Pol-II
ENST00000362802.1	U4 spliceosomal RNA	Pol-II
ENST00000362839.1	U4 spliceosomal RNA	Pol-II
ENST00000363050.1	U4 spliceosomal RNA	Pol-II
ENST00000363164.1	U4 spliceosomal RNA	Pol-II
ENST00000363192.1	U4 spliceosomal RNA	Pol-II
ENST00000363200.1	U4 spliceosomal RNA	Pol-II
ENST00000363404.1	U4 spliceosomal RNA	Pol-II
ENST00000363561.1	U4 spliceosomal RNA	Pol-II
ENST00000363783.1	U4 spliceosomal RNA	Pol-II
ENST00000364019.1	U4 spliceosomal RNA	Pol-II
ENST00000364104.1	U4 spliceosomal RNA	Pol-II
ENST00000364200.1	U4 spliceosomal RNA	Pol-II
ENST00000364206.1	U4 spliceosomal RNA	Pol-II
ENST00000364294.1	U4 spliceosomal RNA	Pol-II
ENST00000364314.1	U4 spliceosomal RNA	Pol-II
ENST00000364316.1	U4 spliceosomal RNA	Pol-II
ENST00000364351.1	U4 spliceosomal RNA	Pol-II
ENST00000364361.1	U4 spliceosomal RNA	Pol-II
ENST00000364383.1	U4 spliceosomal RNA	Pol-II
ENST00000364426.1	U4 spliceosomal RNA	Pol-II
ENST00000364447.1	U4 spliceosomal RNA	Pol-II
ENST00000364472.1	U4 spliceosomal RNA	Pol-II
ENST00000364509.1	U4 spliceosomal RNA	Pol-II
ENST00000364565.1	U4 spliceosomal RNA	Pol-II
ENST00000364569.1	U4 spliceosomal RNA	Pol-II
ENST00000364588.1	U4 spliceosomal RNA	Pol-II
ENST00000364621.1	U4 spliceosomal RNA	Pol-II
ENST00000364675.1	U4 spliceosomal RNA	Pol-II
ENST00000364700.1	U4 spliceosomal RNA	Pol-II
ENST00000364737.1	U4 spliceosomal RNA	Pol-II
ENST00000364738.1	U4 spliceosomal RNA	Pol-II
ENST00000364739.1	U4 spliceosomal RNA	Pol-II
ENST00000364758.1	U4 spliceosomal RNA	Pol-II
ENST00000364778.1	U4 spliceosomal RNA	Pol-II
ENST00000364936.1	U4 spliceosomal RNA	Pol-II
ENST00000364951.1	U4 spliceosomal RNA	Pol-II
ENST00000365199.1	U4 spliceosomal RNA	Pol-II
ENST00000365233.1	U4 spliceosomal RNA	Pol-II
ENST00000365287.1	U4 spliceosomal RNA	Pol-II
ENST00000365469.1	U4 spliceosomal RNA	Pol-II
ENST00000365559.1	U4 spliceosomal RNA	Pol-II
ENST00000365598.1	U4 spliceosomal RNA	Pol-II
ENST00000365601.1	U4 spliceosomal RNA	Pol-II
ENST00000384209.1	U4 spliceosomal RNA	Pol-II
ENST00000384211.1	U4 spliceosomal RNA	Pol-II
ENST00000384579.1	U4 spliceosomal RNA	Pol-II
ENST00000410125.1	U4 spliceosomal RNA	Pol-II
ENST00000410135.1	U4 spliceosomal RNA	Pol-II
ENST00000410214.1	U4 spliceosomal RNA	Pol-II
ENST00000410245.1	U4 spliceosomal RNA	Pol-II
ENST00000410270.1	U4 spliceosomal RNA	Pol-II
ENST00000410431.1	U4 spliceosomal RNA	Pol-II
ENST00000410473.1	U4 spliceosomal RNA	Pol-II
ENST00000410569.1	U4 spliceosomal RNA	Pol-II
ENST00000410628.1	U4 spliceosomal RNA	Pol-II
ENST00000410677.1	U4 spliceosomal RNA	Pol-II
ENST00000410731.1	U4 spliceosomal RNA	Pol-II
ENST00000410754.1	U4 spliceosomal RNA	Pol-II
ENST00000410795.1	U4 spliceosomal RNA	Pol-II
ENST00000410804.1	U4 spliceosomal RNA	Pol-II
ENST00000410818.1	U4 spliceosomal RNA	Pol-II
ENST00000410828.1	U4 spliceosomal RNA	Pol-II
ENST00000410858.1	U4 spliceosomal RNA	Pol-II
ENST00000410863.1	U4 spliceosomal RNA	Pol-II
ENST00000410876.1	U4 spliceosomal RNA	Pol-II
ENST00000410889.1	U4 spliceosomal RNA	Pol-II
ENST00000410940.1	U4 spliceosomal RNA	Pol-II
ENST00000411058.1	U4 spliceosomal RNA	Pol-II
ENST00000411220.1	U4 spliceosomal RNA	Pol-II
ENST00000411243.1	U4 spliceosomal RNA	Pol-II
ENST00000411280.1	U4 spliceosomal RNA	Pol-II
ENST00000411313.1	U4 spliceosomal RNA	Pol-II
ENST00000515943.1	U4 spliceosomal RNA	Pol-II
ENST00000515980.2	U4 spliceosomal RNA	Pol-II
ENST00000516080.1	U4 spliceosomal RNA	Pol-II
ENST00000516258.1	U4 spliceosomal RNA	Pol-II
ENST00000516428.1	U4 spliceosomal RNA	Pol-II
ENST00000516692.1	U4 spliceosomal RNA	Pol-II
ENST00000516751.1	U4 spliceosomal RNA	Pol-II
ENST00000517239.1	U4 spliceosomal RNA	Pol-II
ENST00000572180.1	U4 spliceosomal RNA	Pol-II
ENST00000607255.1	U4 spliceosomal RNA	Pol-II
ENST00000607443.1	U4 spliceosomal RNA	Pol-II
ENST00000617137.1	U4 spliceosomal RNA	Pol-II
ENST00000618561.1	U4 spliceosomal RNA	Pol-II
ENST00000620349.1	U4 spliceosomal RNA	Pol-II
ENST00000620626.1	U4 spliceosomal RNA	Pol-II
ENST00000621047.1	U4 spliceosomal RNA	Pol-II
ENST00000621618.1	U4 spliceosomal RNA	Pol-II
ENST00000638126.1	U4 spliceosomal RNA	Pol-II
ENST00000639198.1	U4 spliceosomal RNA	Pol-II
NR_023343.1	U4atac spliceosomal RNA	Pol-II
ENST00000408512.1	U4atac spliceosomal RNA	Pol-II
ENST00000408674.1	U4atac spliceosomal RNA	Pol-II
ENST00000515932.1	U4atac spliceosomal RNA	Pol-II
ENST00000515939.1	U4atac spliceosomal RNA	Pol-II
ENST00000516179.1	U4atac spliceosomal RNA	Pol-II
ENST00000516196.2	U4atac spliceosomal RNA	Pol-II
ENST00000516204.1	U4atac spliceosomal RNA	Pol-II
ENST00000516280.1	U4atac spliceosomal RNA	Pol-II
ENST00000516307.1	U4atac spliceosomal RNA	Pol-II
ENST00000516415.1	U4atac spliceosomal RNA	Pol-II
ENST00000516460.1	U4atac spliceosomal RNA	Pol-II
ENST00000516592.1	U4atac spliceosomal RNA	Pol-II
ENST00000516699.1	U4atac spliceosomal RNA	Pol-II
ENST00000516967.1	U4atac spliceosomal RNA	Pol-II
ENST00000517146.1	U4atac spliceosomal RNA	Pol-II
ENST00000517226.1	U4atac spliceosomal RNA	Pol-II
ENST00000517272.1	U4atac spliceosomal RNA	Pol-II
ENST00000618345.1	U4atac spliceosomal RNA	Pol-II
NR_002753.5	U5 spliceosomal RNA	Pol-II
NR_002754.2	U5 spliceosomal RNA	Pol-II
NR_002755.3	U5 spliceosomal RNA	Pol-II
NR_002756.2	U5 spliceosomal RNA	Pol-II
NR_002757.3	U5 spliceosomal RNA	Pol-II
ENST00000362979.1	U5 spliceosomal RNA	Pol-II
ENST00000363036.1	U5 spliceosomal RNA	Pol-II
ENST00000363502.1	U5 spliceosomal RNA	Pol-II
ENST00000363506.1	U5 spliceosomal RNA	Pol-II
ENST00000363508.1	U5 spliceosomal RNA	Pol-II
ENST00000363696.1	U5 spliceosomal RNA	Pol-II
ENST00000363767.1	U5 spliceosomal RNA	Pol-II
ENST00000364102.1	U5 spliceosomal RNA	Pol-II
ENST00000364931.1	U5 spliceosomal RNA	Pol-II
ENST00000365290.1	U5 spliceosomal RNA	Pol-II
ENST00000365379.1	U5 spliceosomal RNA	Pol-II
ENST00000365574.1	U5 spliceosomal RNA	Pol-II
ENST00000384136.1	U5 spliceosomal RNA	Pol-II
ENST00000384337.1	U5 spliceosomal RNA	Pol-II
ENST00000411054.1	U5 spliceosomal RNA	Pol-II
ENST00000411164.1	U5 spliceosomal RNA	Pol-II
ENST00000515913.1	U5 spliceosomal RNA	Pol-II
ENST00000515941.1	U5 spliceosomal RNA	Pol-II
ENST00000515979.1	U5 spliceosomal RNA	Pol-II
ENST00000516066.1	U5 spliceosomal RNA	Pol-II
ENST00000516581.1	U5 spliceosomal RNA	Pol-II
ENST00000516588.1	U5 spliceosomal RNA	Pol-II
ENST00000516601.1	U5 spliceosomal RNA	Pol-II
ENST00000516712.1	U5 spliceosomal RNA	Pol-II
ENST00000516765.2	U5 spliceosomal RNA	Pol-II
ENST00000522581.1	U5 spliceosomal RNA	Pol-II
ENST00000629478.1	U5 spliceosomal RNA	Pol-II
ENST00000642968.1	U5 spliceosomal RNA	Pol-II
ENST00000672203.1	U5 spliceosomal RNA	Pol-II
NR_004394.1	U6 spliceosomal RNA	Pol-III
NR_104080.1	U6 spliceosomal RNA	Pol-III
NR_104084.1	U6 spliceosomal RNA	Pol-III
NR_104088.1	U6 spliceosomal RNA	Pol-III
NR_125730.1	U6 spliceosomal RNA	Pol-III
ENST00000362347.1	U6 spliceosomal RNA	Pol-III
ENST00000362349.1	U6 spliceosomal RNA	Pol-III
ENST00000362356.1	U6 spliceosomal RNA	Pol-III
ENST00000362367.1	U6 spliceosomal RNA	Pol-III
ENST00000362376.1	U6 spliceosomal RNA	Pol-III
ENST00000362378.1	U6 spliceosomal RNA	Pol-III
ENST00000362381.1	U6 spliceosomal RNA	Pol-III
ENST00000362390.1	U6 spliceosomal RNA	Pol-III
ENST00000362402.1	U6 spliceosomal RNA	Pol-III
ENST00000362409.1	U6 spliceosomal RNA	Pol-III
ENST00000362416.1	U6 spliceosomal RNA	Pol-III
ENST00000362419.1	U6 spliceosomal RNA	Pol-III
ENST00000362425.1	U6 spliceosomal RNA	Pol-III
ENST00000362431.1	U6 spliceosomal RNA	Pol-III
ENST00000362436.1	U6 spliceosomal RNA	Pol-III
ENST00000362438.1	U6 spliceosomal RNA	Pol-III
ENST00000362456.1	U6 spliceosomal RNA	Pol-III
ENST00000362457.1	U6 spliceosomal RNA	Pol-III
ENST00000362465.1	U6 spliceosomal RNA	Pol-III
ENST00000362478.1	U6 spliceosomal RNA	Pol-III
ENST00000362490.1	U6 spliceosomal RNA	Pol-III
ENST00000362498.1	U6 spliceosomal RNA	Pol-III
ENST00000362511.1	U6 spliceosomal RNA	Pol-III
ENST00000362515.1	U6 spliceosomal RNA	Pol-III
ENST00000362524.1	U6 spliceosomal RNA	Pol-III
ENST00000362576.1	U6 spliceosomal RNA	Pol-III
ENST00000362578.1	U6 spliceosomal RNA	Pol-III
ENST00000362590.2	U6 spliceosomal RNA	Pol-III
ENST00000362598.1	U6 spliceosomal RNA	Pol-III
ENST00000362612.1	U6 spliceosomal RNA	Pol-III
ENST00000362622.1	U6 spliceosomal RNA	Pol-III
ENST00000362636.1	U6 spliceosomal RNA	Pol-III
ENST00000362642.1	U6 spliceosomal RNA	Pol-III
ENST00000362644.1	U6 spliceosomal RNA	Pol-III
ENST00000362650.1	U6 spliceosomal RNA	Pol-III
ENST00000362659.1	U6 spliceosomal RNA	Pol-III
ENST00000362666.1	U6 spliceosomal RNA	Pol-III
ENST00000362681.1	U6 spliceosomal RNA	Pol-III
ENST00000362692.1	U6 spliceosomal RNA	Pol-III
ENST00000362700.1	U6 spliceosomal RNA	Pol-III
ENST00000362707.1	U6 spliceosomal RNA	Pol-III
ENST00000362724.1	U6 spliceosomal RNA	Pol-III
ENST00000362728.1	U6 spliceosomal RNA	Pol-III
ENST00000362731.1	U6 spliceosomal RNA	Pol-III
ENST00000362733.1	U6 spliceosomal RNA	Pol-III
ENST00000362756.1	U6 spliceosomal RNA	Pol-III
ENST00000362757.1	U6 spliceosomal RNA	Pol-III
ENST00000362775.1	U6 spliceosomal RNA	Pol-III
ENST00000362776.1	U6 spliceosomal RNA	Pol-III
ENST00000362794.1	U6 spliceosomal RNA	Pol-III
ENST00000362804.1	U6 spliceosomal RNA	Pol-III
ENST00000362825.1	U6 spliceosomal RNA	Pol-III
ENST00000362827.1	U6 spliceosomal RNA	Pol-III
ENST00000362830.1	U6 spliceosomal RNA	Pol-III
ENST00000362832.1	U6 spliceosomal RNA	Pol-III
ENST00000362858.1	U6 spliceosomal RNA	Pol-III
ENST00000362861.1	U6 spliceosomal RNA	Pol-III
ENST00000362865.1	U6 spliceosomal RNA	Pol-III
ENST00000362869.1	U6 spliceosomal RNA	Pol-III
ENST00000362895.1	U6 spliceosomal RNA	Pol-III
ENST00000362897.1	U6 spliceosomal RNA	Pol-III
ENST00000362914.1	U6 spliceosomal RNA	Pol-III
ENST00000362920.1	U6 spliceosomal RNA	Pol-III
ENST00000362921.1	U6 spliceosomal RNA	Pol-III
ENST00000362922.1	U6 spliceosomal RNA	Pol-III
ENST00000362926.1	U6 spliceosomal RNA	Pol-III
ENST00000362933.1	U6 spliceosomal RNA	Pol-III
ENST00000362942.1	U6 spliceosomal RNA	Pol-III
ENST00000362944.1	U6 spliceosomal RNA	Pol-III
ENST00000362954.1	U6 spliceosomal RNA	Pol-III
ENST00000362957.1	U6 spliceosomal RNA	Pol-III
ENST00000362985.1	U6 spliceosomal RNA	Pol-III
ENST00000362988.1	U6 spliceosomal RNA	Pol-III
ENST00000362989.1	U6 spliceosomal RNA	Pol-III
ENST00000362995.1	U6 spliceosomal RNA	Pol-III
ENST00000363002.1	U6 spliceosomal RNA	Pol-III
ENST00000363010.1	U6 spliceosomal RNA	Pol-III
ENST00000363015.1	U6 spliceosomal RNA	Pol-III
ENST00000363016.1	U6 spliceosomal RNA	Pol-III
ENST00000363033.1	U6 spliceosomal RNA	Pol-III
ENST00000363035.1	U6 spliceosomal RNA	Pol-III
ENST00000363051.1	U6 spliceosomal RNA	Pol-III
ENST00000363054.1	U6 spliceosomal RNA	Pol-III
ENST00000363074.1	U6 spliceosomal RNA	Pol-III
ENST00000363093.1	U6 spliceosomal RNA	Pol-III
ENST00000363101.1	U6 spliceosomal RNA	Pol-III
ENST00000363116.1	U6 spliceosomal RNA	Pol-III
ENST00000363133.1	U6 spliceosomal RNA	Pol-III
ENST00000363143.1	U6 spliceosomal RNA	Pol-III
ENST00000363159.1	U6 spliceosomal RNA	Pol-III
ENST00000363163.1	U6 spliceosomal RNA	Pol-III
ENST00000363178.1	U6 spliceosomal RNA	Pol-III
ENST00000363216.1	U6 spliceosomal RNA	Pol-III
ENST00000363225.1	U6 spliceosomal RNA	Pol-III
ENST00000363227.1	U6 spliceosomal RNA	Pol-III
ENST00000363231.1	U6 spliceosomal RNA	Pol-III
ENST00000363232.1	U6 spliceosomal RNA	Pol-III
ENST00000363235.1	U6 spliceosomal RNA	Pol-III
ENST00000363236.1	U6 spliceosomal RNA	Pol-III
ENST00000363237.1	U6 spliceosomal RNA	Pol-III
ENST00000363238.1	U6 spliceosomal RNA	Pol-III
ENST00000363262.1	U6 spliceosomal RNA	Pol-III
ENST00000363269.1	U6 spliceosomal RNA	Pol-III
ENST00000363276.1	U6 spliceosomal RNA	Pol-III
ENST00000363282.1	U6 spliceosomal RNA	Pol-III
ENST00000363283.1	U6 spliceosomal RNA	Pol-III
ENST00000363305.1	U6 spliceosomal RNA	Pol-III
ENST00000363313.1	U6 spliceosomal RNA	Pol-III
ENST00000363319.1	U6 spliceosomal RNA	Pol-III
ENST00000363343.1	U6 spliceosomal RNA	Pol-III
ENST00000363346.2	U6 spliceosomal RNA	Pol-III
ENST00000363347.1	U6 spliceosomal RNA	Pol-III
ENST00000363348.1	U6 spliceosomal RNA	Pol-III
ENST00000363350.1	U6 spliceosomal RNA	Pol-III
ENST00000363354.2	U6 spliceosomal RNA	Pol-III
ENST00000363377.1	U6 spliceosomal RNA	Pol-III
ENST00000363380.1	U6 spliceosomal RNA	Pol-III
ENST00000363383.1	U6 spliceosomal RNA	Pol-III
ENST00000363384.1	U6 spliceosomal RNA	Pol-III
ENST00000363387.1	U6 spliceosomal RNA	Pol-III
ENST00000363397.1	U6 spliceosomal RNA	Pol-III
ENST00000363399.1	U6 spliceosomal RNA	Pol-III
ENST00000363411.1	U6 spliceosomal RNA	Pol-III
ENST00000363425.1	U6 spliceosomal RNA	Pol-III
ENST00000363433.1	U6 spliceosomal RNA	Pol-III
ENST00000363434.1	U6 spliceosomal RNA	Pol-III
ENST00000363461.1	U6 spliceosomal RNA	Pol-III
ENST00000363475.2	U6 spliceosomal RNA	Pol-III
ENST00000363480.1	U6 spliceosomal RNA	Pol-III
ENST00000363486.1	U6 spliceosomal RNA	Pol-III
ENST00000363490.1	U6 spliceosomal RNA	Pol-III
ENST00000363496.1	U6 spliceosomal RNA	Pol-III
ENST00000363499.1	U6 spliceosomal RNA	Pol-III
ENST00000363518.1	U6 spliceosomal RNA	Pol-III
ENST00000363519.1	U6 spliceosomal RNA	Pol-III
ENST00000363523.1	U6 spliceosomal RNA	Pol-III
ENST00000363533.1	U6 spliceosomal RNA	Pol-III
ENST00000363537.1	U6 spliceosomal RNA	Pol-III
ENST00000363554.1	U6 spliceosomal RNA	Pol-III
ENST00000363567.1	U6 spliceosomal RNA	Pol-III
ENST00000363573.1	U6 spliceosomal RNA	Pol-III
ENST00000363574.1	U6 spliceosomal RNA	Pol-III
ENST00000363576.1	U6 spliceosomal RNA	Pol-III
ENST00000363585.1	U6 spliceosomal RNA	Pol-III
ENST00000363586.1	U6 spliceosomal RNA	Pol-III
ENST00000363592.1	U6 spliceosomal RNA	Pol-III
ENST00000363599.1	U6 spliceosomal RNA	Pol-III
ENST00000363601.1	U6 spliceosomal RNA	Pol-III
ENST00000363613.1	U6 spliceosomal RNA	Pol-III
ENST00000363614.1	U6 spliceosomal RNA	Pol-III
ENST00000363625.1	U6 spliceosomal RNA	Pol-III
ENST00000363650.1	U6 spliceosomal RNA	Pol-III
ENST00000363652.1	U6 spliceosomal RNA	Pol-III
ENST00000363655.1	U6 spliceosomal RNA	Pol-III
ENST00000363658.1	U6 spliceosomal RNA	Pol-III
ENST00000363680.1	U6 spliceosomal RNA	Pol-III
ENST00000363684.1	U6 spliceosomal RNA	Pol-III
ENST00000363685.1	U6 spliceosomal RNA	Pol-III
ENST00000363686.1	U6 spliceosomal RNA	Pol-III
ENST00000363690.1	U6 spliceosomal RNA	Pol-III
ENST00000363693.1	U6 spliceosomal RNA	Pol-III
ENST00000363700.1	U6 spliceosomal RNA	Pol-III
ENST00000363701.1	U6 spliceosomal RNA	Pol-III
ENST00000363705.1	U6 spliceosomal RNA	Pol-III
ENST00000363724.1	U6 spliceosomal RNA	Pol-III
ENST00000363752.1	U6 spliceosomal RNA	Pol-III
ENST00000363775.1	U6 spliceosomal RNA	Pol-III
ENST00000363778.1	U6 spliceosomal RNA	Pol-III
ENST00000363795.1	U6 spliceosomal RNA	Pol-III
ENST00000363800.1	U6 spliceosomal RNA	Pol-III
ENST00000363811.1	U6 spliceosomal RNA	Pol-III
ENST00000363813.1	U6 spliceosomal RNA	Pol-III
ENST00000363831.1	U6 spliceosomal RNA	Pol-III
ENST00000363833.1	U6 spliceosomal RNA	Pol-III
ENST00000363843.1	U6 spliceosomal RNA	Pol-III
ENST00000363850.1	U6 spliceosomal RNA	Pol-III
ENST00000363858.1	U6 spliceosomal RNA	Pol-III
ENST00000363862.1	U6 spliceosomal RNA	Pol-III
ENST00000363886.1	U6 spliceosomal RNA	Pol-III
ENST00000363889.1	U6 spliceosomal RNA	Pol-III
ENST00000363893.1	U6 spliceosomal RNA	Pol-III
ENST00000363904.1	U6 spliceosomal RNA	Pol-III
ENST00000363909.1	U6 spliceosomal RNA	Pol-III
ENST00000363920.1	U6 spliceosomal RNA	Pol-III
ENST00000363926.1	U6 spliceosomal RNA	Pol-III
ENST00000363929.1	U6 spliceosomal RNA	Pol-III
ENST00000363944.1	U6 spliceosomal RNA	Pol-III
ENST00000363945.1	U6 spliceosomal RNA	Pol-III
ENST00000363947.1	U6 spliceosomal RNA	Pol-III
ENST00000363948.1	U6 spliceosomal RNA	Pol-III
ENST00000363957.1	U6 spliceosomal RNA	Pol-III
ENST00000363970.1	U6 spliceosomal RNA	Pol-III
ENST00000363999.1	U6 spliceosomal RNA	Pol-III
ENST00000364001.1	U6 spliceosomal RNA	Pol-III
ENST00000364005.1	U6 spliceosomal RNA	Pol-III
ENST00000364007.1	U6 spliceosomal RNA	Pol-III
ENST00000364012.1	U6 spliceosomal RNA	Pol-III
ENST00000364017.1	U6 spliceosomal RNA	Pol-III
ENST00000364023.1	U6 spliceosomal RNA	Pol-III
ENST00000364028.1	U6 spliceosomal RNA	Pol-III
ENST00000364032.1	U6 spliceosomal RNA	Pol-III
ENST00000364036.1	U6 spliceosomal RNA	Pol-III
ENST00000364047.1	U6 spliceosomal RNA	Pol-III
ENST00000364054.1	U6 spliceosomal RNA	Pol-III
ENST00000364056.1	U6 spliceosomal RNA	Pol-III
ENST00000364065.1	U6 spliceosomal RNA	Pol-III
ENST00000364071.1	U6 spliceosomal RNA	Pol-III
ENST00000364072.1	U6 spliceosomal RNA	Pol-III
ENST00000364087.1	U6 spliceosomal RNA	Pol-III
ENST00000364093.1	U6 spliceosomal RNA	Pol-III
ENST00000364116.1	U6 spliceosomal RNA	Pol-III
ENST00000364131.1	U6 spliceosomal RNA	Pol-III
ENST00000364145.1	U6 spliceosomal RNA	Pol-III
ENST00000364146.1	U6 spliceosomal RNA	Pol-III
ENST00000364151.1	U6 spliceosomal RNA	Pol-III
ENST00000364158.1	U6 spliceosomal RNA	Pol-III
ENST00000364162.1	U6 spliceosomal RNA	Pol-III
ENST00000364174.1	U6 spliceosomal RNA	Pol-III
ENST00000364180.1	U6 spliceosomal RNA	Pol-III
ENST00000364195.1	U6 spliceosomal RNA	Pol-III
ENST00000364207.1	U6 spliceosomal RNA	Pol-III
ENST00000364215.1	U6 spliceosomal RNA	Pol-III
ENST00000364225.1	U6 spliceosomal RNA	Pol-III
ENST00000364227.1	U6 spliceosomal RNA	Pol-III
ENST00000364234.1	U6 spliceosomal RNA	Pol-III
ENST00000364243.1	U6 spliceosomal RNA	Pol-III
ENST00000364265.1	U6 spliceosomal RNA	Pol-III
ENST00000364266.1	U6 spliceosomal RNA	Pol-III
ENST00000364283.1	U6 spliceosomal RNA	Pol-III
ENST00000364292.1	U6 spliceosomal RNA	Pol-III
ENST00000364295.1	U6 spliceosomal RNA	Pol-III
ENST00000364306.1	U6 spliceosomal RNA	Pol-III
ENST00000364309.1	U6 spliceosomal RNA	Pol-III
ENST00000364310.1	U6 spliceosomal RNA	Pol-III
ENST00000364312.1	U6 spliceosomal RNA	Pol-III
ENST00000364328.1	U6 spliceosomal RNA	Pol-III
ENST00000364353.1	U6 spliceosomal RNA	Pol-III
ENST00000364371.1	U6 spliceosomal RNA	Pol-III
ENST00000364373.1	U6 spliceosomal RNA	Pol-III
ENST00000364385.1	U6 spliceosomal RNA	Pol-III
ENST00000364390.1	U6 spliceosomal RNA	Pol-III
ENST00000364400.1	U6 spliceosomal RNA	Pol-III
ENST00000364403.1	U6 spliceosomal RNA	Pol-III
ENST00000364418.1	U6 spliceosomal RNA	Pol-III
ENST00000364422.1	U6 spliceosomal RNA	Pol-III
ENST00000364424.1	U6 spliceosomal RNA	Pol-III
ENST00000364428.1	U6 spliceosomal RNA	Pol-III
ENST00000364438.1	U6 spliceosomal RNA	Pol-III
ENST00000364454.1	U6 spliceosomal RNA	Pol-III
ENST00000364471.1	U6 spliceosomal RNA	Pol-III
ENST00000364497.1	U6 spliceosomal RNA	Pol-III
ENST00000364502.1	U6 spliceosomal RNA	Pol-III
ENST00000364512.1	U6 spliceosomal RNA	Pol-III
ENST00000364516.1	U6 spliceosomal RNA	Pol-III
ENST00000364520.1	U6 spliceosomal RNA	Pol-III
ENST00000364522.1	U6 spliceosomal RNA	Pol-III
ENST00000364561.1	U6 spliceosomal RNA	Pol-III
ENST00000364563.1	U6 spliceosomal RNA	Pol-III
ENST00000364566.1	U6 spliceosomal RNA	Pol-III
ENST00000364571.1	U6 spliceosomal RNA	Pol-III
ENST00000364573.1	U6 spliceosomal RNA	Pol-III
ENST00000364574.1	U6 spliceosomal RNA	Pol-III
ENST00000364582.1	U6 spliceosomal RNA	Pol-III
ENST00000364604.1	U6 spliceosomal RNA	Pol-III
ENST00000364629.1	U6 spliceosomal RNA	Pol-III
ENST00000364647.1	U6 spliceosomal RNA	Pol-III
ENST00000364649.1	U6 spliceosomal RNA	Pol-III
ENST00000364654.1	U6 spliceosomal RNA	Pol-III
ENST00000364680.1	U6 spliceosomal RNA	Pol-III
ENST00000364690.1	U6 spliceosomal RNA	Pol-III
ENST00000364709.1	U6 spliceosomal RNA	Pol-III
ENST00000364716.1	U6 spliceosomal RNA	Pol-III
ENST00000364721.1	U6 spliceosomal RNA	Pol-III
ENST00000364728.1	U6 spliceosomal RNA	Pol-III
ENST00000364734.1	U6 spliceosomal RNA	Pol-III
ENST00000364743.1	U6 spliceosomal RNA	Pol-III
ENST00000364752.1	U6 spliceosomal RNA	Pol-III
ENST00000364753.1	U6 spliceosomal RNA	Pol-III
ENST00000364771.1	U6 spliceosomal RNA	Pol-III
ENST00000364772.1	U6 spliceosomal RNA	Pol-III
ENST00000364788.1	U6 spliceosomal RNA	Pol-III
ENST00000364792.1	U6 spliceosomal RNA	Pol-III
ENST00000364817.1	U6 spliceosomal RNA	Pol-III
ENST00000364837.1	U6 spliceosomal RNA	Pol-III
ENST00000364839.1	U6 spliceosomal RNA	Pol-III
ENST00000364841.1	U6 spliceosomal RNA	Pol-III
ENST00000364855.1	U6 spliceosomal RNA	Pol-III
ENST00000364872.1	U6 spliceosomal RNA	Pol-III
ENST00000364874.1	U6 spliceosomal RNA	Pol-III
ENST00000364876.1	U6 spliceosomal RNA	Pol-III
ENST00000364877.1	U6 spliceosomal RNA	Pol-III
ENST00000364882.1	U6 spliceosomal RNA	Pol-III
ENST00000364891.1	U6 spliceosomal RNA	Pol-III
ENST00000364900.1	U6 spliceosomal RNA	Pol-III
ENST00000364905.1	U6 spliceosomal RNA	Pol-III
ENST00000364910.1	U6 spliceosomal RNA	Pol-III
ENST00000364919.1	U6 spliceosomal RNA	Pol-III
ENST00000364926.1	U6 spliceosomal RNA	Pol-III
ENST00000364935.1	U6 spliceosomal RNA	Pol-III
ENST00000364943.1	U6 spliceosomal RNA	Pol-III
ENST00000364945.1	U6 spliceosomal RNA	Pol-III
ENST00000364955.1	U6 spliceosomal RNA	Pol-III
ENST00000364956.1	U6 spliceosomal RNA	Pol-III
ENST00000364982.1	U6 spliceosomal RNA	Pol-III
ENST00000364999.1	U6 spliceosomal RNA	Pol-III
ENST00000365024.1	U6 spliceosomal RNA	Pol-III
ENST00000365039.1	U6 spliceosomal RNA	Pol-III
ENST00000365049.1	U6 spliceosomal RNA	Pol-III
ENST00000365084.1	U6 spliceosomal RNA	Pol-III
ENST00000365146.1	U6 spliceosomal RNA	Pol-III
ENST00000365147.1	U6 spliceosomal RNA	Pol-III
ENST00000365154.1	U6 spliceosomal RNA	Pol-III
ENST00000365155.1	U6 spliceosomal RNA	Pol-III
ENST00000365156.1	U6 spliceosomal RNA	Pol-III
ENST00000365159.1	U6 spliceosomal RNA	Pol-III
ENST00000365164.1	U6 spliceosomal RNA	Pol-III
ENST00000365169.1	U6 spliceosomal RNA	Pol-III
ENST00000365180.1	U6 spliceosomal RNA	Pol-III
ENST00000365181.1	U6 spliceosomal RNA	Pol-III
ENST00000365200.1	U6 spliceosomal RNA	Pol-III
ENST00000365204.1	U6 spliceosomal RNA	Pol-III
ENST00000365211.1	U6 spliceosomal RNA	Pol-III
ENST00000365212.2	U6 spliceosomal RNA	Pol-III
ENST00000365219.1	U6 spliceosomal RNA	Pol-III
ENST00000365225.1	U6 spliceosomal RNA	Pol-III
ENST00000365229.1	U6 spliceosomal RNA	Pol-III
ENST00000365242.1	U6 spliceosomal RNA	Pol-III
ENST00000365249.1	U6 spliceosomal RNA	Pol-III
ENST00000365280.1	U6 spliceosomal RNA	Pol-III
ENST00000365289.1	U6 spliceosomal RNA	Pol-III
ENST00000365302.1	U6 spliceosomal RNA	Pol-III
ENST00000365314.1	U6 spliceosomal RNA	Pol-III
ENST00000365316.1	U6 spliceosomal RNA	Pol-III
ENST00000365335.1	U6 spliceosomal RNA	Pol-III
ENST00000365336.1	U6 spliceosomal RNA	Pol-III
ENST00000365357.1	U6 spliceosomal RNA	Pol-III
ENST00000365359.1	U6 spliceosomal RNA	Pol-III
ENST00000365367.1	U6 spliceosomal RNA	Pol-III
ENST00000365369.1	U6 spliceosomal RNA	Pol-III
ENST00000365370.1	U6 spliceosomal RNA	Pol-III
ENST00000365372.1	U6 spliceosomal RNA	Pol-III
ENST00000365375.1	U6 spliceosomal RNA	Pol-III
ENST00000365380.2	U6 spliceosomal RNA	Pol-III
ENST00000365389.1	U6 spliceosomal RNA	Pol-III
ENST00000365395.1	U6 spliceosomal RNA	Pol-III
ENST00000365415.1	U6 spliceosomal RNA	Pol-III
ENST00000365426.1	U6 spliceosomal RNA	Pol-III
ENST00000365430.1	U6 spliceosomal RNA	Pol-III
ENST00000365434.1	U6 spliceosomal RNA	Pol-III
ENST00000365438.1	U6 spliceosomal RNA	Pol-III
ENST00000365459.1	U6 spliceosomal RNA	Pol-III
ENST00000365466.1	U6 spliceosomal RNA	Pol-III
ENST00000365471.1	U6 spliceosomal RNA	Pol-III
ENST00000365480.1	U6 spliceosomal RNA	Pol-III
ENST00000365488.1	U6 spliceosomal RNA	Pol-III
ENST00000365528.1	U6 spliceosomal RNA	Pol-III
ENST00000365553.1	U6 spliceosomal RNA	Pol-III
ENST00000365557.1	U6 spliceosomal RNA	Pol-III
ENST00000365558.1	U6 spliceosomal RNA	Pol-III
ENST00000365561.1	U6 spliceosomal RNA	Pol-III
ENST00000365563.1	U6 spliceosomal RNA	Pol-III
ENST00000365575.1	U6 spliceosomal RNA	Pol-III
ENST00000365608.1	U6 spliceosomal RNA	Pol-III
ENST00000365615.1	U6 spliceosomal RNA	Pol-III
ENST00000365620.1	U6 spliceosomal RNA	Pol-III
ENST00000365621.1	U6 spliceosomal RNA	Pol-III
ENST00000365627.1	U6 spliceosomal RNA	Pol-III
ENST00000365643.1	U6 spliceosomal RNA	Pol-III
ENST00000365658.1	U6 spliceosomal RNA	Pol-III
ENST00000365662.1	U6 spliceosomal RNA	Pol-III
ENST00000365664.1	U6 spliceosomal RNA	Pol-III
ENST00000383856.1	U6 spliceosomal RNA	Pol-III
ENST00000383860.1	U6 spliceosomal RNA	Pol-III
ENST00000383862.1	U6 spliceosomal RNA	Pol-III
ENST00000383863.1	U6 spliceosomal RNA	Pol-III
ENST00000383866.1	U6 spliceosomal RNA	Pol-III
ENST00000383868.1	U6 spliceosomal RNA	Pol-III
ENST00000383871.1	U6 spliceosomal RNA	Pol-III
ENST00000383872.1	U6 spliceosomal RNA	Pol-III
ENST00000383873.1	U6 spliceosomal RNA	Pol-III
ENST00000383874.1	U6 spliceosomal RNA	Pol-III
ENST00000383877.1	U6 spliceosomal RNA	Pol-III
ENST00000383878.1	U6 spliceosomal RNA	Pol-III
ENST00000383879.1	U6 spliceosomal RNA	Pol-III
ENST00000383886.1	U6 spliceosomal RNA	Pol-III
ENST00000383887.1	U6 spliceosomal RNA	Pol-III
ENST00000383888.1	U6 spliceosomal RNA	Pol-III
ENST00000383889.1	U6 spliceosomal RNA	Pol-III
ENST00000383891.1	U6 spliceosomal RNA	Pol-III
ENST00000383896.1	U6 spliceosomal RNA	Pol-III
ENST00000383900.1	U6 spliceosomal RNA	Pol-III
ENST00000383904.1	U6 spliceosomal RNA	Pol-III
ENST00000383908.1	U6 spliceosomal RNA	Pol-III
ENST00000383911.1	U6 spliceosomal RNA	Pol-III
ENST00000383914.1	U6 spliceosomal RNA	Pol-III
ENST00000383917.1	U6 spliceosomal RNA	Pol-III
ENST00000383927.1	U6 spliceosomal RNA	Pol-III
ENST00000383931.1	U6 spliceosomal RNA	Pol-III
ENST00000383938.1	U6 spliceosomal RNA	Pol-III
ENST00000383940.2	U6 spliceosomal RNA	Pol-III
ENST00000383944.1	U6 spliceosomal RNA	Pol-III
ENST00000383947.1	U6 spliceosomal RNA	Pol-III
ENST00000383948.1	U6 spliceosomal RNA	Pol-III
ENST00000383951.1	U6 spliceosomal RNA	Pol-III
ENST00000383954.1	U6 spliceosomal RNA	Pol-III
ENST00000383957.1	U6 spliceosomal RNA	Pol-III
ENST00000383958.1	U6 spliceosomal RNA	Pol-III
ENST00000383959.1	U6 spliceosomal RNA	Pol-III
ENST00000383968.1	U6 spliceosomal RNA	Pol-III
ENST00000383973.1	U6 spliceosomal RNA	Pol-III
ENST00000383974.1	U6 spliceosomal RNA	Pol-III
ENST00000383976.1	U6 spliceosomal RNA	Pol-III
ENST00000383981.1	U6 spliceosomal RNA	Pol-III
ENST00000383982.1	U6 spliceosomal RNA	Pol-III
ENST00000383983.1	U6 spliceosomal RNA	Pol-III
ENST00000383985.1	U6 spliceosomal RNA	Pol-III
ENST00000383988.1	U6 spliceosomal RNA	Pol-III
ENST00000383989.1	U6 spliceosomal RNA	Pol-III
ENST00000383991.1	U6 spliceosomal RNA	Pol-III
ENST00000383995.1	U6 spliceosomal RNA	Pol-III
ENST00000383996.1	U6 spliceosomal RNA	Pol-III
ENST00000383997.1	U6 spliceosomal RNA	Pol-III
ENST00000383998.1	U6 spliceosomal RNA	Pol-III
ENST00000383999.1	U6 spliceosomal RNA	Pol-III
ENST00000384002.1	U6 spliceosomal RNA	Pol-III
ENST00000384003.1	U6 spliceosomal RNA	Pol-III
ENST00000384005.1	U6 spliceosomal RNA	Pol-III
ENST00000384006.1	U6 spliceosomal RNA	Pol-III
ENST00000384016.1	U6 spliceosomal RNA	Pol-III
ENST00000384017.1	U6 spliceosomal RNA	Pol-III
ENST00000384018.1	U6 spliceosomal RNA	Pol-III
ENST00000384019.1	U6 spliceosomal RNA	Pol-III
ENST00000384020.1	U6 spliceosomal RNA	Pol-III
ENST00000384022.1	U6 spliceosomal RNA	Pol-III
ENST00000384025.1	U6 spliceosomal RNA	Pol-III
ENST00000384031.1	U6 spliceosomal RNA	Pol-III
ENST00000384032.1	U6 spliceosomal RNA	Pol-III
ENST00000384035.1	U6 spliceosomal RNA	Pol-III
ENST00000384036.1	U6 spliceosomal RNA	Pol-III
ENST00000384037.1	U6 spliceosomal RNA	Pol-III
ENST00000384038.1	U6 spliceosomal RNA	Pol-III
ENST00000384039.1	U6 spliceosomal RNA	Pol-III
ENST00000384040.1	U6 spliceosomal RNA	Pol-III
ENST00000384042.1	U6 spliceosomal RNA	Pol-III
ENST00000384045.1	U6 spliceosomal RNA	Pol-III
ENST00000384047.1	U6 spliceosomal RNA	Pol-III
ENST00000384050.1	U6 spliceosomal RNA	Pol-III
ENST00000384051.1	U6 spliceosomal RNA	Pol-III
ENST00000384055.1	U6 spliceosomal RNA	Pol-III
ENST00000384056.2	U6 spliceosomal RNA	Pol-III
ENST00000384059.1	U6 spliceosomal RNA	Pol-III
ENST00000384060.1	U6 spliceosomal RNA	Pol-III
ENST00000384061.1	U6 spliceosomal RNA	Pol-III
ENST00000384069.1	U6 spliceosomal RNA	Pol-III
ENST00000384074.1	U6 spliceosomal RNA	Pol-III
ENST00000384075.1	U6 spliceosomal RNA	Pol-III
ENST00000384076.1	U6 spliceosomal RNA	Pol-III
ENST00000384077.1	U6 spliceosomal RNA	Pol-III
ENST00000384080.1	U6 spliceosomal RNA	Pol-III
ENST00000384085.1	U6 spliceosomal RNA	Pol-III
ENST00000384088.1	U6 spliceosomal RNA	Pol-III
ENST00000384091.1	U6 spliceosomal RNA	Pol-III
ENST00000384092.1	U6 spliceosomal RNA	Pol-III
ENST00000384099.1	U6 spliceosomal RNA	Pol-III
ENST00000384100.1	U6 spliceosomal RNA	Pol-III
ENST00000384105.1	U6 spliceosomal RNA	Pol-III
ENST00000384106.1	U6 spliceosomal RNA	Pol-III
ENST00000384109.1	U6 spliceosomal RNA	Pol-III
ENST00000384112.1	U6 spliceosomal RNA	Pol-III
ENST00000384114.1	U6 spliceosomal RNA	Pol-III
ENST00000384115.1	U6 spliceosomal RNA	Pol-III
ENST00000384116.1	U6 spliceosomal RNA	Pol-III
ENST00000384118.1	U6 spliceosomal RNA	Pol-III
ENST00000384121.1	U6 spliceosomal RNA	Pol-III
ENST00000384125.1	U6 spliceosomal RNA	Pol-III
ENST00000384128.1	U6 spliceosomal RNA	Pol-III
ENST00000384129.2	U6 spliceosomal RNA	Pol-III
ENST00000384130.1	U6 spliceosomal RNA	Pol-III
ENST00000384132.1	U6 spliceosomal RNA	Pol-III
ENST00000384137.1	U6 spliceosomal RNA	Pol-III
ENST00000384139.1	U6 spliceosomal RNA	Pol-III
ENST00000384140.1	U6 spliceosomal RNA	Pol-III
ENST00000384143.1	U6 spliceosomal RNA	Pol-III
ENST00000384144.1	U6 spliceosomal RNA	Pol-III
ENST00000384148.1	U6 spliceosomal RNA	Pol-III
ENST00000384150.1	U6 spliceosomal RNA	Pol-III
ENST00000384153.1	U6 spliceosomal RNA	Pol-III
ENST00000384154.1	U6 spliceosomal RNA	Pol-III
ENST00000384160.1	U6 spliceosomal RNA	Pol-III
ENST00000384161.1	U6 spliceosomal RNA	Pol-III
ENST00000384162.1	U6 spliceosomal RNA	Pol-III
ENST00000384164.1	U6 spliceosomal RNA	Pol-III
ENST00000384165.1	U6 spliceosomal RNA	Pol-III
ENST00000384169.1	U6 spliceosomal RNA	Pol-III
ENST00000384172.1	U6 spliceosomal RNA	Pol-III
ENST00000384173.1	U6 spliceosomal RNA	Pol-III
ENST00000384179.1	U6 spliceosomal RNA	Pol-III
ENST00000384180.1	U6 spliceosomal RNA	Pol-III
ENST00000384188.1	U6 spliceosomal RNA	Pol-III
ENST00000384191.1	U6 spliceosomal RNA	Pol-III
ENST00000384194.1	U6 spliceosomal RNA	Pol-III
ENST00000384195.1	U6 spliceosomal RNA	Pol-III
ENST00000384196.1	U6 spliceosomal RNA	Pol-III
ENST00000384197.1	U6 spliceosomal RNA	Pol-III
ENST00000384199.1	U6 spliceosomal RNA	Pol-III
ENST00000384204.1	U6 spliceosomal RNA	Pol-III
ENST00000384205.1	U6 spliceosomal RNA	Pol-III
ENST00000384208.1	U6 spliceosomal RNA	Pol-III
ENST00000384212.1	U6 spliceosomal RNA	Pol-III
ENST00000384217.1	U6 spliceosomal RNA	Pol-III
ENST00000384222.1	U6 spliceosomal RNA	Pol-III
ENST00000384227.1	U6 spliceosomal RNA	Pol-III
ENST00000384233.1	U6 spliceosomal RNA	Pol-III
ENST00000384235.1	U6 spliceosomal RNA	Pol-III
ENST00000384236.1	U6 spliceosomal RNA	Pol-III
ENST00000384238.1	U6 spliceosomal RNA	Pol-III
ENST00000384242.1	U6 spliceosomal RNA	Pol-III
ENST00000384243.1	U6 spliceosomal RNA	Pol-III
ENST00000384245.1	U6 spliceosomal RNA	Pol-III
ENST00000384246.1	U6 spliceosomal RNA	Pol-III
ENST00000384247.1	U6 spliceosomal RNA	Pol-III
ENST00000384248.1	U6 spliceosomal RNA	Pol-III
ENST00000384253.1	U6 spliceosomal RNA	Pol-III
ENST00000384254.1	U6 spliceosomal RNA	Pol-III
ENST00000384256.1	U6 spliceosomal RNA	Pol-III
ENST00000384258.1	U6 spliceosomal RNA	Pol-III
ENST00000384264.1	U6 spliceosomal RNA	Pol-III
ENST00000384265.1	U6 spliceosomal RNA	Pol-III
ENST00000384269.1	U6 spliceosomal RNA	Pol-III
ENST00000384270.1	U6 spliceosomal RNA	Pol-III
ENST00000384272.1	U6 spliceosomal RNA	Pol-III
ENST00000384273.1	U6 spliceosomal RNA	Pol-III
ENST00000384276.1	U6 spliceosomal RNA	Pol-III
ENST00000384277.1	U6 spliceosomal RNA	Pol-III
ENST00000384280.1	U6 spliceosomal RNA	Pol-III
ENST00000384283.1	U6 spliceosomal RNA	Pol-III
ENST00000384285.2	U6 spliceosomal RNA	Pol-III
ENST00000384286.1	U6 spliceosomal RNA	Pol-III
ENST00000384292.1	U6 spliceosomal RNA	Pol-III
ENST00000384296.1	U6 spliceosomal RNA	Pol-III
ENST00000384299.1	U6 spliceosomal RNA	Pol-III
ENST00000384302.1	U6 spliceosomal RNA	Pol-III
ENST00000384306.1	U6 spliceosomal RNA	Pol-III
ENST00000384310.1	U6 spliceosomal RNA	Pol-III
ENST00000384314.1	U6 spliceosomal RNA	Pol-III
ENST00000384315.1	U6 spliceosomal RNA	Pol-III
ENST00000384317.1	U6 spliceosomal RNA	Pol-III
ENST00000384318.1	U6 spliceosomal RNA	Pol-III
ENST00000384319.1	U6 spliceosomal RNA	Pol-III
ENST00000384324.1	U6 spliceosomal RNA	Pol-III
ENST00000384325.1	U6 spliceosomal RNA	Pol-III
ENST00000384330.1	U6 spliceosomal RNA	Pol-III
ENST00000384332.1	U6 spliceosomal RNA	Pol-III
ENST00000384340.1	U6 spliceosomal RNA	Pol-III
ENST00000384343.1	U6 spliceosomal RNA	Pol-III
ENST00000384344.1	U6 spliceosomal RNA	Pol-III
ENST00000384348.1	U6 spliceosomal RNA	Pol-III
ENST00000384349.1	U6 spliceosomal RNA	Pol-III
ENST00000384353.1	U6 spliceosomal RNA	Pol-III
ENST00000384354.1	U6 spliceosomal RNA	Pol-III
ENST00000384355.1	U6 spliceosomal RNA	Pol-III
ENST00000384359.1	U6 spliceosomal RNA	Pol-III
ENST00000384361.1	U6 spliceosomal RNA	Pol-III
ENST00000384362.1	U6 spliceosomal RNA	Pol-III
ENST00000384367.1	U6 spliceosomal RNA	Pol-III
ENST00000384369.1	U6 spliceosomal RNA	Pol-III
ENST00000384371.1	U6 spliceosomal RNA	Pol-III
ENST00000384376.1	U6 spliceosomal RNA	Pol-III
ENST00000384385.1	U6 spliceosomal RNA	Pol-III
ENST00000384386.1	U6 spliceosomal RNA	Pol-III
ENST00000384387.1	U6 spliceosomal RNA	Pol-III
ENST00000384388.1	U6 spliceosomal RNA	Pol-III
ENST00000384393.1	U6 spliceosomal RNA	Pol-III
ENST00000384394.1	U6 spliceosomal RNA	Pol-III
ENST00000384396.1	U6 spliceosomal RNA	Pol-III
ENST00000384399.1	U6 spliceosomal RNA	Pol-III
ENST00000384405.1	U6 spliceosomal RNA	Pol-III
ENST00000384406.1	U6 spliceosomal RNA	Pol-III
ENST00000384407.1	U6 spliceosomal RNA	Pol-III
ENST00000384409.1	U6 spliceosomal RNA	Pol-III
ENST00000384415.1	U6 spliceosomal RNA	Pol-III
ENST00000384420.1	U6 spliceosomal RNA	Pol-III
ENST00000384421.1	U6 spliceosomal RNA	Pol-III
ENST00000384424.1	U6 spliceosomal RNA	Pol-III
ENST00000384427.1	U6 spliceosomal RNA	Pol-III
ENST00000384429.1	U6 spliceosomal RNA	Pol-III
ENST00000384431.1	U6 spliceosomal RNA	Pol-III
ENST00000384433.1	U6 spliceosomal RNA	Pol-III
ENST00000384434.1	U6 spliceosomal RNA	Pol-III
ENST00000384438.1	U6 spliceosomal RNA	Pol-III
ENST00000384440.1	U6 spliceosomal RNA	Pol-III
ENST00000384441.1	U6 spliceosomal RNA	Pol-III
ENST00000384443.1	U6 spliceosomal RNA	Pol-III
ENST00000384449.1	U6 spliceosomal RNA	Pol-III
ENST00000384451.1	U6 spliceosomal RNA	Pol-III
ENST00000384454.1	U6 spliceosomal RNA	Pol-III
ENST00000384456.1	U6 spliceosomal RNA	Pol-III
ENST00000384461.1	U6 spliceosomal RNA	Pol-III
ENST00000384463.1	U6 spliceosomal RNA	Pol-III
ENST00000384465.1	U6 spliceosomal RNA	Pol-III
ENST00000384469.1	U6 spliceosomal RNA	Pol-III
ENST00000384471.1	U6 spliceosomal RNA	Pol-III
ENST00000384473.1	U6 spliceosomal RNA	Pol-III
ENST00000384474.1	U6 spliceosomal RNA	Pol-III
ENST00000384475.1	U6 spliceosomal RNA	Pol-III
ENST00000384477.1	U6 spliceosomal RNA	Pol-III
ENST00000384479.1	U6 spliceosomal RNA	Pol-III
ENST00000384485.1	U6 spliceosomal RNA	Pol-III
ENST00000384493.1	U6 spliceosomal RNA	Pol-III
ENST00000384496.1	U6 spliceosomal RNA	Pol-III
ENST00000384498.1	U6 spliceosomal RNA	Pol-III
ENST00000384505.1	U6 spliceosomal RNA	Pol-III
ENST00000384508.1	U6 spliceosomal RNA	Pol-III
ENST00000384513.1	U6 spliceosomal RNA	Pol-III
ENST00000384519.1	U6 spliceosomal RNA	Pol-III
ENST00000384521.1	U6 spliceosomal RNA	Pol-III
ENST00000384525.1	U6 spliceosomal RNA	Pol-III
ENST00000384526.1	U6 spliceosomal RNA	Pol-III
ENST00000384527.1	U6 spliceosomal RNA	Pol-III
ENST00000384530.1	U6 spliceosomal RNA	Pol-III
ENST00000384531.1	U6 spliceosomal RNA	Pol-III
ENST00000384534.1	U6 spliceosomal RNA	Pol-III
ENST00000384536.1	U6 spliceosomal RNA	Pol-III
ENST00000384537.1	U6 spliceosomal RNA	Pol-III
ENST00000384540.1	U6 spliceosomal RNA	Pol-III
ENST00000384545.1	U6 spliceosomal RNA	Pol-III
ENST00000384546.1	U6 spliceosomal RNA	Pol-III
ENST00000384548.1	U6 spliceosomal RNA	Pol-III
ENST00000384557.1	U6 spliceosomal RNA	Pol-III
ENST00000384559.1	U6 spliceosomal RNA	Pol-III
ENST00000384561.1	U6 spliceosomal RNA	Pol-III
ENST00000384565.1	U6 spliceosomal RNA	Pol-III
ENST00000384566.1	U6 spliceosomal RNA	Pol-III
ENST00000384568.1	U6 spliceosomal RNA	Pol-III
ENST00000384576.1	U6 spliceosomal RNA	Pol-III
ENST00000384577.1	U6 spliceosomal RNA	Pol-III
ENST00000384578.1	U6 spliceosomal RNA	Pol-III
ENST00000384580.1	U6 spliceosomal RNA	Pol-III
ENST00000384582.1	U6 spliceosomal RNA	Pol-III
ENST00000384588.1	U6 spliceosomal RNA	Pol-III
ENST00000384591.1	U6 spliceosomal RNA	Pol-III
ENST00000384593.1	U6 spliceosomal RNA	Pol-III
ENST00000384597.1	U6 spliceosomal RNA	Pol-III
ENST00000384598.1	U6 spliceosomal RNA	Pol-III
ENST00000384600.1	U6 spliceosomal RNA	Pol-III
ENST00000384601.1	U6 spliceosomal RNA	Pol-III
ENST00000384602.1	U6 spliceosomal RNA	Pol-III
ENST00000384603.1	U6 spliceosomal RNA	Pol-III
ENST00000384604.1	U6 spliceosomal RNA	Pol-III
ENST00000384606.1	U6 spliceosomal RNA	Pol-III
ENST00000384608.1	U6 spliceosomal RNA	Pol-III
ENST00000384613.1	U6 spliceosomal RNA	Pol-III
ENST00000384615.1	U6 spliceosomal RNA	Pol-III
ENST00000384617.1	U6 spliceosomal RNA	Pol-III
ENST00000384622.1	U6 spliceosomal RNA	Pol-III
ENST00000384625.1	U6 spliceosomal RNA	Pol-III
ENST00000384629.1	U6 spliceosomal RNA	Pol-III
ENST00000384630.1	U6 spliceosomal RNA	Pol-III
ENST00000384631.1	U6 spliceosomal RNA	Pol-III
ENST00000384632.1	U6 spliceosomal RNA	Pol-III
ENST00000384634.1	U6 spliceosomal RNA	Pol-III
ENST00000384636.1	U6 spliceosomal RNA	Pol-III
ENST00000384637.1	U6 spliceosomal RNA	Pol-III
ENST00000384639.1	U6 spliceosomal RNA	Pol-III
ENST00000384648.1	U6 spliceosomal RNA	Pol-III
ENST00000384651.1	U6 spliceosomal RNA	Pol-III
ENST00000384655.1	U6 spliceosomal RNA	Pol-III
ENST00000384663.1	U6 spliceosomal RNA	Pol-III
ENST00000384664.1	U6 spliceosomal RNA	Pol-III
ENST00000384667.1	U6 spliceosomal RNA	Pol-III
ENST00000384668.1	U6 spliceosomal RNA	Pol-III
ENST00000384671.1	U6 spliceosomal RNA	Pol-III
ENST00000384681.1	U6 spliceosomal RNA	Pol-III
ENST00000384683.1	U6 spliceosomal RNA	Pol-III
ENST00000384684.1	U6 spliceosomal RNA	Pol-III
ENST00000384691.1	U6 spliceosomal RNA	Pol-III
ENST00000384697.1	U6 spliceosomal RNA	Pol-III
ENST00000384700.2	U6 spliceosomal RNA	Pol-III
ENST00000384702.1	U6 spliceosomal RNA	Pol-III
ENST00000384703.1	U6 spliceosomal RNA	Pol-III
ENST00000384704.1	U6 spliceosomal RNA	Pol-III
ENST00000384709.1	U6 spliceosomal RNA	Pol-III
ENST00000384710.1	U6 spliceosomal RNA	Pol-III
ENST00000384712.1	U6 spliceosomal RNA	Pol-III
ENST00000384717.1	U6 spliceosomal RNA	Pol-III
ENST00000384718.1	U6 spliceosomal RNA	Pol-III
ENST00000384720.1	U6 spliceosomal RNA	Pol-III
ENST00000384721.1	U6 spliceosomal RNA	Pol-III
ENST00000384722.1	U6 spliceosomal RNA	Pol-III
ENST00000384723.1	U6 spliceosomal RNA	Pol-III
ENST00000384724.1	U6 spliceosomal RNA	Pol-III
ENST00000384725.1	U6 spliceosomal RNA	Pol-III
ENST00000384726.1	U6 spliceosomal RNA	Pol-III
ENST00000384728.1	U6 spliceosomal RNA	Pol-III
ENST00000384730.1	U6 spliceosomal RNA	Pol-III
ENST00000384731.1	U6 spliceosomal RNA	Pol-III
ENST00000384741.1	U6 spliceosomal RNA	Pol-III
ENST00000384745.1	U6 spliceosomal RNA	Pol-III
ENST00000384746.2	U6 spliceosomal RNA	Pol-III
ENST00000384752.1	U6 spliceosomal RNA	Pol-III
ENST00000384755.1	U6 spliceosomal RNA	Pol-III
ENST00000384759.1	U6 spliceosomal RNA	Pol-III
ENST00000384761.1	U6 spliceosomal RNA	Pol-III
ENST00000384773.1	U6 spliceosomal RNA	Pol-III
ENST00000384774.1	U6 spliceosomal RNA	Pol-III
ENST00000384777.1	U6 spliceosomal RNA	Pol-III
ENST00000384780.1	U6 spliceosomal RNA	Pol-III
ENST00000384784.1	U6 spliceosomal RNA	Pol-III
ENST00000384787.1	U6 spliceosomal RNA	Pol-III
ENST00000384793.1	U6 spliceosomal RNA	Pol-III
ENST00000390831.1	U6 spliceosomal RNA	Pol-III
ENST00000390834.1	U6 spliceosomal RNA	Pol-III
ENST00000390838.1	U6 spliceosomal RNA	Pol-III
ENST00000390844.1	U6 spliceosomal RNA	Pol-III
ENST00000390845.1	U6 spliceosomal RNA	Pol-III
ENST00000390854.1	U6 spliceosomal RNA	Pol-III
ENST00000390855.1	U6 spliceosomal RNA	Pol-III
ENST00000390858.1	U6 spliceosomal RNA	Pol-III
ENST00000390865.1	U6 spliceosomal RNA	Pol-III
ENST00000390882.1	U6 spliceosomal RNA	Pol-III
ENST00000390884.1	U6 spliceosomal RNA	Pol-III
ENST00000390887.1	U6 spliceosomal RNA	Pol-III
ENST00000390888.1	U6 spliceosomal RNA	Pol-III
ENST00000390897.1	U6 spliceosomal RNA	Pol-III
ENST00000390905.1	U6 spliceosomal RNA	Pol-III
ENST00000390913.1	U6 spliceosomal RNA	Pol-III
ENST00000390914.1	U6 spliceosomal RNA	Pol-III
ENST00000390917.1	U6 spliceosomal RNA	Pol-III
ENST00000390919.1	U6 spliceosomal RNA	Pol-III
ENST00000390924.1	U6 spliceosomal RNA	Pol-III
ENST00000390928.1	U6 spliceosomal RNA	Pol-III
ENST00000390938.1	U6 spliceosomal RNA	Pol-III
ENST00000390944.1	U6 spliceosomal RNA	Pol-III
ENST00000390945.1	U6 spliceosomal RNA	Pol-III
ENST00000390946.1	U6 spliceosomal RNA	Pol-III
ENST00000390955.1	U6 spliceosomal RNA	Pol-III
ENST00000390957.1	U6 spliceosomal RNA	Pol-III
ENST00000390958.1	U6 spliceosomal RNA	Pol-III
ENST00000390967.1	U6 spliceosomal RNA	Pol-III
ENST00000390980.1	U6 spliceosomal RNA	Pol-III
ENST00000390990.1	U6 spliceosomal RNA	Pol-III
ENST00000390995.1	U6 spliceosomal RNA	Pol-III
ENST00000390996.1	U6 spliceosomal RNA	Pol-III
ENST00000391001.1	U6 spliceosomal RNA	Pol-III
ENST00000391003.1	U6 spliceosomal RNA	Pol-III
ENST00000391012.2	U6 spliceosomal RNA	Pol-III
ENST00000391014.1	U6 spliceosomal RNA	Pol-III
ENST00000391022.1	U6 spliceosomal RNA	Pol-III
ENST00000391025.1	U6 spliceosomal RNA	Pol-III
ENST00000391027.1	U6 spliceosomal RNA	Pol-III
ENST00000391028.1	U6 spliceosomal RNA	Pol-III
ENST00000391030.1	U6 spliceosomal RNA	Pol-III
ENST00000391038.1	U6 spliceosomal RNA	Pol-III
ENST00000391042.1	U6 spliceosomal RNA	Pol-III
ENST00000391043.1	U6 spliceosomal RNA	Pol-III
ENST00000391046.1	U6 spliceosomal RNA	Pol-III
ENST00000391052.1	U6 spliceosomal RNA	Pol-III
ENST00000391056.1	U6 spliceosomal RNA	Pol-III
ENST00000391057.1	U6 spliceosomal RNA	Pol-III
ENST00000391058.1	U6 spliceosomal RNA	Pol-III
ENST00000391064.1	U6 spliceosomal RNA	Pol-III
ENST00000391066.1	U6 spliceosomal RNA	Pol-III
ENST00000391068.1	U6 spliceosomal RNA	Pol-III
ENST00000391072.1	U6 spliceosomal RNA	Pol-III
ENST00000391077.1	U6 spliceosomal RNA	Pol-III
ENST00000391080.1	U6 spliceosomal RNA	Pol-III
ENST00000391083.1	U6 spliceosomal RNA	Pol-III
ENST00000391085.1	U6 spliceosomal RNA	Pol-III
ENST00000391086.1	U6 spliceosomal RNA	Pol-III
ENST00000391087.1	U6 spliceosomal RNA	Pol-III
ENST00000391096.1	U6 spliceosomal RNA	Pol-III
ENST00000391105.1	U6 spliceosomal RNA	Pol-III
ENST00000391108.1	U6 spliceosomal RNA	Pol-III
ENST00000391118.1	U6 spliceosomal RNA	Pol-III
ENST00000391139.1	U6 spliceosomal RNA	Pol-III
ENST00000391140.1	U6 spliceosomal RNA	Pol-III
ENST00000391144.1	U6 spliceosomal RNA	Pol-III
ENST00000391148.1	U6 spliceosomal RNA	Pol-III
ENST00000391155.1	U6 spliceosomal RNA	Pol-III
ENST00000391157.1	U6 spliceosomal RNA	Pol-III
ENST00000391158.1	U6 spliceosomal RNA	Pol-III
ENST00000391164.1	U6 spliceosomal RNA	Pol-III
ENST00000391166.1	U6 spliceosomal RNA	Pol-III
ENST00000391167.1	U6 spliceosomal RNA	Pol-III
ENST00000391173.1	U6 spliceosomal RNA	Pol-III
ENST00000391180.1	U6 spliceosomal RNA	Pol-III
ENST00000391183.1	U6 spliceosomal RNA	Pol-III
ENST00000391187.1	U6 spliceosomal RNA	Pol-III
ENST00000391193.1	U6 spliceosomal RNA	Pol-III
ENST00000391194.1	U6 spliceosomal RNA	Pol-III
ENST00000391208.1	U6 spliceosomal RNA	Pol-III
ENST00000391214.1	U6 spliceosomal RNA	Pol-III
ENST00000391218.1	U6 spliceosomal RNA	Pol-III
ENST00000391219.1	U6 spliceosomal RNA	Pol-III
ENST00000391224.1	U6 spliceosomal RNA	Pol-III
ENST00000391233.1	U6 spliceosomal RNA	Pol-III
ENST00000391239.1	U6 spliceosomal RNA	Pol-III
ENST00000391243.1	U6 spliceosomal RNA	Pol-III
ENST00000391244.1	U6 spliceosomal RNA	Pol-III
ENST00000391253.1	U6 spliceosomal RNA	Pol-III
ENST00000391258.1	U6 spliceosomal RNA	Pol-III
ENST00000391259.1	U6 spliceosomal RNA	Pol-III
ENST00000391262.1	U6 spliceosomal RNA	Pol-III
ENST00000391266.1	U6 spliceosomal RNA	Pol-III
ENST00000391270.1	U6 spliceosomal RNA	Pol-III
ENST00000391282.1	U6 spliceosomal RNA	Pol-III
ENST00000391295.1	U6 spliceosomal RNA	Pol-III
ENST00000391297.1	U6 spliceosomal RNA	Pol-III
ENST00000391310.1	U6 spliceosomal RNA	Pol-III
ENST00000391321.1	U6 spliceosomal RNA	Pol-III
ENST00000410119.1	U6 spliceosomal RNA	Pol-III
ENST00000410155.1	U6 spliceosomal RNA	Pol-III
ENST00000410160.1	U6 spliceosomal RNA	Pol-III
ENST00000410182.1	U6 spliceosomal RNA	Pol-III
ENST00000410190.1	U6 spliceosomal RNA	Pol-III
ENST00000410207.1	U6 spliceosomal RNA	Pol-III
ENST00000410238.1	U6 spliceosomal RNA	Pol-III
ENST00000410281.1	U6 spliceosomal RNA	Pol-III
ENST00000410293.1	U6 spliceosomal RNA	Pol-III
ENST00000410317.1	U6 spliceosomal RNA	Pol-III
ENST00000410323.1	U6 spliceosomal RNA	Pol-III
ENST00000410334.1	U6 spliceosomal RNA	Pol-III
ENST00000410335.1	U6 spliceosomal RNA	Pol-III
ENST00000410350.1	U6 spliceosomal RNA	Pol-III
ENST00000410355.1	U6 spliceosomal RNA	Pol-III
ENST00000410365.1	U6 spliceosomal RNA	Pol-III
ENST00000410371.1	U6 spliceosomal RNA	Pol-III
ENST00000410382.1	U6 spliceosomal RNA	Pol-III
ENST00000410388.1	U6 spliceosomal RNA	Pol-III
ENST00000410395.1	U6 spliceosomal RNA	Pol-III
ENST00000410397.1	U6 spliceosomal RNA	Pol-III
ENST00000410406.1	U6 spliceosomal RNA	Pol-III
ENST00000410412.1	U6 spliceosomal RNA	Pol-III
ENST00000410416.2	U6 spliceosomal RNA	Pol-III
ENST00000410424.1	U6 spliceosomal RNA	Pol-III
ENST00000410427.1	U6 spliceosomal RNA	Pol-III
ENST00000410429.1	U6 spliceosomal RNA	Pol-III
ENST00000410466.1	U6 spliceosomal RNA	Pol-III
ENST00000410467.1	U6 spliceosomal RNA	Pol-III
ENST00000410497.1	U6 spliceosomal RNA	Pol-III
ENST00000410499.1	U6 spliceosomal RNA	Pol-III
ENST00000410506.1	U6 spliceosomal RNA	Pol-III
ENST00000410507.1	U6 spliceosomal RNA	Pol-III
ENST00000410517.1	U6 spliceosomal RNA	Pol-III
ENST00000410525.1	U6 spliceosomal RNA	Pol-III
ENST00000410554.1	U6 spliceosomal RNA	Pol-III
ENST00000410556.1	U6 spliceosomal RNA	Pol-III
ENST00000410558.1	U6 spliceosomal RNA	Pol-III
ENST00000410590.1	U6 spliceosomal RNA	Pol-III
ENST00000410601.1	U6 spliceosomal RNA	Pol-III
ENST00000410612.1	U6 spliceosomal RNA	Pol-III
ENST00000410626.1	U6 spliceosomal RNA	Pol-III
ENST00000410629.1	U6 spliceosomal RNA	Pol-III
ENST00000410660.1	U6 spliceosomal RNA	Pol-III
ENST00000410675.1	U6 spliceosomal RNA	Pol-III
ENST00000410678.1	U6 spliceosomal RNA	Pol-III
ENST00000410691.1	U6 spliceosomal RNA	Pol-III
ENST00000410703.1	U6 spliceosomal RNA	Pol-III
ENST00000410720.1	U6 spliceosomal RNA	Pol-III
ENST00000410735.1	U6 spliceosomal RNA	Pol-III
ENST00000410747.1	U6 spliceosomal RNA	Pol-III
ENST00000410759.1	U6 spliceosomal RNA	Pol-III
ENST00000410811.1	U6 spliceosomal RNA	Pol-III
ENST00000410829.1	U6 spliceosomal RNA	Pol-III
ENST00000410845.1	U6 spliceosomal RNA	Pol-III
ENST00000410859.1	U6 spliceosomal RNA	Pol-III
ENST00000410860.1	U6 spliceosomal RNA	Pol-III
ENST00000410864.1	U6 spliceosomal RNA	Pol-III
ENST00000410912.1	U6 spliceosomal RNA	Pol-III
ENST00000410926.1	U6 spliceosomal RNA	Pol-III
ENST00000410930.2	U6 spliceosomal RNA	Pol-III
ENST00000410937.1	U6 spliceosomal RNA	Pol-III
ENST00000410938.1	U6 spliceosomal RNA	Pol-III
ENST00000410958.1	U6 spliceosomal RNA	Pol-III
ENST00000410963.1	U6 spliceosomal RNA	Pol-III
ENST00000410977.1	U6 spliceosomal RNA	Pol-III
ENST00000410983.1	U6 spliceosomal RNA	Pol-III
ENST00000410992.1	U6 spliceosomal RNA	Pol-III
ENST00000411000.1	U6 spliceosomal RNA	Pol-III
ENST00000411008.1	U6 spliceosomal RNA	Pol-III
ENST00000411028.1	U6 spliceosomal RNA	Pol-III
ENST00000411040.1	U6 spliceosomal RNA	Pol-III
ENST00000411083.1	U6 spliceosomal RNA	Pol-III
ENST00000411092.1	U6 spliceosomal RNA	Pol-III
ENST00000411105.1	U6 spliceosomal RNA	Pol-III
ENST00000411112.1	U6 spliceosomal RNA	Pol-III
ENST00000411115.1	U6 spliceosomal RNA	Pol-III
ENST00000411130.1	U6 spliceosomal RNA	Pol-III
ENST00000411132.1	U6 spliceosomal RNA	Pol-III
ENST00000411155.2	U6 spliceosomal RNA	Pol-III
ENST00000411247.3	U6 spliceosomal RNA	Pol-III
ENST00000411249.1	U6 spliceosomal RNA	Pol-III
ENST00000411257.1	U6 spliceosomal RNA	Pol-III
ENST00000411259.1	U6 spliceosomal RNA	Pol-III
ENST00000411265.1	U6 spliceosomal RNA	Pol-III
ENST00000411276.1	U6 spliceosomal RNA	Pol-III
ENST00000411283.1	U6 spliceosomal RNA	Pol-III
ENST00000411285.1	U6 spliceosomal RNA	Pol-III
ENST00000411293.1	U6 spliceosomal RNA	Pol-III
ENST00000411324.1	U6 spliceosomal RNA	Pol-III
ENST00000411326.1	U6 spliceosomal RNA	Pol-III
ENST00000411331.1	U6 spliceosomal RNA	Pol-III
ENST00000411333.1	U6 spliceosomal RNA	Pol-III
ENST00000411348.1	U6 spliceosomal RNA	Pol-III
ENST00000411352.1	U6 spliceosomal RNA	Pol-III
ENST00000411355.1	U6 spliceosomal RNA	Pol-III
ENST00000411374.2	U6 spliceosomal RNA	Pol-III
ENST00000411377.1	U6 spliceosomal RNA	Pol-III
ENST00000411381.1	U6 spliceosomal RNA	Pol-III
ENST00000411398.1	U6 spliceosomal RNA	Pol-III
ENST00000411403.1	U6 spliceosomal RNA	Pol-III
ENST00000458780.1	U6 spliceosomal RNA	Pol-III
ENST00000458841.1	U6 spliceosomal RNA	Pol-III
ENST00000458868.1	U6 spliceosomal RNA	Pol-III
ENST00000458990.1	U6 spliceosomal RNA	Pol-III
ENST00000459076.1	U6 spliceosomal RNA	Pol-III
ENST00000459080.1	U6 spliceosomal RNA	Pol-III
ENST00000459117.1	U6 spliceosomal RNA	Pol-III
ENST00000459134.1	U6 spliceosomal RNA	Pol-III
ENST00000459154.1	U6 spliceosomal RNA	Pol-III
ENST00000459179.1	U6 spliceosomal RNA	Pol-III
ENST00000459214.1	U6 spliceosomal RNA	Pol-III
ENST00000459318.1	U6 spliceosomal RNA	Pol-III
ENST00000459351.1	U6 spliceosomal RNA	Pol-III
ENST00000459383.1	U6 spliceosomal RNA	Pol-III
ENST00000459408.1	U6 spliceosomal RNA	Pol-III
ENST00000459412.1	U6 spliceosomal RNA	Pol-III
ENST00000459461.1	U6 spliceosomal RNA	Pol-III
ENST00000459468.1	U6 spliceosomal RNA	Pol-III
ENST00000459506.1	U6 spliceosomal RNA	Pol-III
ENST00000459541.1	U6 spliceosomal RNA	Pol-III
ENST00000459566.1	U6 spliceosomal RNA	Pol-III
ENST00000459571.1	U6 spliceosomal RNA	Pol-III
ENST00000459588.1	U6 spliceosomal RNA	Pol-III
ENST00000459597.1	U6 spliceosomal RNA	Pol-III
ENST00000459618.1	U6 spliceosomal RNA	Pol-III
ENST00000515893.1	U6 spliceosomal RNA	Pol-III
ENST00000515894.1	U6 spliceosomal RNA	Pol-III
ENST00000515902.1	U6 spliceosomal RNA	Pol-III
ENST00000515910.1	U6 spliceosomal RNA	Pol-III
ENST00000515918.1	U6 spliceosomal RNA	Pol-III
ENST00000515930.1	U6 spliceosomal RNA	Pol-III
ENST00000515944.1	U6 spliceosomal RNA	Pol-III
ENST00000515945.1	U6 spliceosomal RNA	Pol-III
ENST00000515948.1	U6 spliceosomal RNA	Pol-III
ENST00000515952.1	U6 spliceosomal RNA	Pol-III
ENST00000515954.1	U6 spliceosomal RNA	Pol-III
ENST00000515962.2	U6 spliceosomal RNA	Pol-III
ENST00000515964.1	U6 spliceosomal RNA	Pol-III
ENST00000515965.1	U6 spliceosomal RNA	Pol-III
ENST00000515974.1	U6 spliceosomal RNA	Pol-III
ENST00000515985.1	U6 spliceosomal RNA	Pol-III
ENST00000515989.1	U6 spliceosomal RNA	Pol-III
ENST00000515995.1	U6 spliceosomal RNA	Pol-III
ENST00000515998.1	U6 spliceosomal RNA	Pol-III
ENST00000516004.1	U6 spliceosomal RNA	Pol-III
ENST00000516010.1	U6 spliceosomal RNA	Pol-III
ENST00000516012.1	U6 spliceosomal RNA	Pol-III
ENST00000516022.1	U6 spliceosomal RNA	Pol-III
ENST00000516025.1	U6 spliceosomal RNA	Pol-III
ENST00000516032.1	U6 spliceosomal RNA	Pol-III
ENST00000516033.1	U6 spliceosomal RNA	Pol-III
ENST00000516034.1	U6 spliceosomal RNA	Pol-III
ENST00000516042.1	U6 spliceosomal RNA	Pol-III
ENST00000516045.1	U6 spliceosomal RNA	Pol-III
ENST00000516050.1	U6 spliceosomal RNA	Pol-III
ENST00000516056.1	U6 spliceosomal RNA	Pol-III
ENST00000516065.1	U6 spliceosomal RNA	Pol-III
ENST00000516073.1	U6 spliceosomal RNA	Pol-III
ENST00000516077.1	U6 spliceosomal RNA	Pol-III
ENST00000516078.2	U6 spliceosomal RNA	Pol-III
ENST00000516086.1	U6 spliceosomal RNA	Pol-III
ENST00000516088.1	U6 spliceosomal RNA	Pol-III
ENST00000516097.2	U6 spliceosomal RNA	Pol-III
ENST00000516098.1	U6 spliceosomal RNA	Pol-III
ENST00000516099.1	U6 spliceosomal RNA	Pol-III
ENST00000516104.1	U6 spliceosomal RNA	Pol-III
ENST00000516114.1	U6 spliceosomal RNA	Pol-III
ENST00000516120.1	U6 spliceosomal RNA	Pol-III
ENST00000516122.1	U6 spliceosomal RNA	Pol-III
ENST00000516125.1	U6 spliceosomal RNA	Pol-III
ENST00000516130.1	U6 spliceosomal RNA	Pol-III
ENST00000516134.1	U6 spliceosomal RNA	Pol-III
ENST00000516137.1	U6 spliceosomal RNA	Pol-III
ENST00000516143.1	U6 spliceosomal RNA	Pol-III
ENST00000516145.1	U6 spliceosomal RNA	Pol-III
ENST00000516146.1	U6 spliceosomal RNA	Pol-III
ENST00000516147.1	U6 spliceosomal RNA	Pol-III
ENST00000516148.1	U6 spliceosomal RNA	Pol-III
ENST00000516149.1	U6 spliceosomal RNA	Pol-III
ENST00000516151.1	U6 spliceosomal RNA	Pol-III
ENST00000516162.1	U6 spliceosomal RNA	Pol-III
ENST00000516163.1	U6 spliceosomal RNA	Pol-III
ENST00000516164.1	U6 spliceosomal RNA	Pol-III
ENST00000516166.1	U6 spliceosomal RNA	Pol-III
ENST00000516168.1	U6 spliceosomal RNA	Pol-III
ENST00000516171.1	U6 spliceosomal RNA	Pol-III
ENST00000516176.1	U6 spliceosomal RNA	Pol-III
ENST00000516189.1	U6 spliceosomal RNA	Pol-III
ENST00000516199.1	U6 spliceosomal RNA	Pol-III
ENST00000516206.1	U6 spliceosomal RNA	Pol-III
ENST00000516208.1	U6 spliceosomal RNA	Pol-III
ENST00000516214.1	U6 spliceosomal RNA	Pol-III
ENST00000516216.1	U6 spliceosomal RNA	Pol-III
ENST00000516217.1	U6 spliceosomal RNA	Pol-III
ENST00000516221.1	U6 spliceosomal RNA	Pol-III
ENST00000516222.1	U6 spliceosomal RNA	Pol-III
ENST00000516223.1	U6 spliceosomal RNA	Pol-III
ENST00000516224.1	U6 spliceosomal RNA	Pol-III
ENST00000516226.1	U6 spliceosomal RNA	Pol-III
ENST00000516228.1	U6 spliceosomal RNA	Pol-III
ENST00000516230.1	U6 spliceosomal RNA	Pol-III
ENST00000516237.1	U6 spliceosomal RNA	Pol-III
ENST00000516244.1	U6 spliceosomal RNA	Pol-III
ENST00000516246.2	U6 spliceosomal RNA	Pol-III
ENST00000516252.1	U6 spliceosomal RNA	Pol-III
ENST00000516253.1	U6 spliceosomal RNA	Pol-III
ENST00000516254.1	U6 spliceosomal RNA	Pol-III
ENST00000516256.1	U6 spliceosomal RNA	Pol-III
ENST00000516259.1	U6 spliceosomal RNA	Pol-III
ENST00000516264.1	U6 spliceosomal RNA	Pol-III
ENST00000516265.1	U6 spliceosomal RNA	Pol-III
ENST00000516270.1	U6 spliceosomal RNA	Pol-III
ENST00000516272.1	U6 spliceosomal RNA	Pol-III
ENST00000516273.1	U6 spliceosomal RNA	Pol-III
ENST00000516282.1	U6 spliceosomal RNA	Pol-III
ENST00000516288.1	U6 spliceosomal RNA	Pol-III
ENST00000516292.2	U6 spliceosomal RNA	Pol-III
ENST00000516294.1	U6 spliceosomal RNA	Pol-III
ENST00000516295.1	U6 spliceosomal RNA	Pol-III
ENST00000516299.1	U6 spliceosomal RNA	Pol-III
ENST00000516304.2	U6 spliceosomal RNA	Pol-III
ENST00000516308.1	U6 spliceosomal RNA	Pol-III
ENST00000516312.1	U6 spliceosomal RNA	Pol-III
ENST00000516316.1	U6 spliceosomal RNA	Pol-III
ENST00000516317.2	U6 spliceosomal RNA	Pol-III
ENST00000516321.1	U6 spliceosomal RNA	Pol-III
ENST00000516323.1	U6 spliceosomal RNA	Pol-III
ENST00000516328.1	U6 spliceosomal RNA	Pol-III
ENST00000516332.1	U6 spliceosomal RNA	Pol-III
ENST00000516336.1	U6 spliceosomal RNA	Pol-III
ENST00000516339.1	U6 spliceosomal RNA	Pol-III
ENST00000516342.1	U6 spliceosomal RNA	Pol-III
ENST00000516346.1	U6 spliceosomal RNA	Pol-III
ENST00000516347.1	U6 spliceosomal RNA	Pol-III
ENST00000516348.1	U6 spliceosomal RNA	Pol-III
ENST00000516353.1	U6 spliceosomal RNA	Pol-III
ENST00000516363.1	U6 spliceosomal RNA	Pol-III
ENST00000516364.1	U6 spliceosomal RNA	Pol-III
ENST00000516374.1	U6 spliceosomal RNA	Pol-III
ENST00000516376.1	U6 spliceosomal RNA	Pol-III
ENST00000516377.1	U6 spliceosomal RNA	Pol-III
ENST00000516382.1	U6 spliceosomal RNA	Pol-III
ENST00000516396.1	U6 spliceosomal RNA	Pol-III
ENST00000516405.1	U6 spliceosomal RNA	Pol-III
ENST00000516411.1	U6 spliceosomal RNA	Pol-III
ENST00000516414.1	U6 spliceosomal RNA	Pol-III
ENST00000516430.2	U6 spliceosomal RNA	Pol-III
ENST00000516434.1	U6 spliceosomal RNA	Pol-III
ENST00000516438.2	U6 spliceosomal RNA	Pol-III
ENST00000516443.1	U6 spliceosomal RNA	Pol-III
ENST00000516454.1	U6 spliceosomal RNA	Pol-III
ENST00000516462.1	U6 spliceosomal RNA	Pol-III
ENST00000516464.1	U6 spliceosomal RNA	Pol-III
ENST00000516470.1	U6 spliceosomal RNA	Pol-III
ENST00000516473.1	U6 spliceosomal RNA	Pol-III
ENST00000516479.1	U6 spliceosomal RNA	Pol-III
ENST00000516485.1	U6 spliceosomal RNA	Pol-III
ENST00000516488.1	U6 spliceosomal RNA	Pol-III
ENST00000516494.2	U6 spliceosomal RNA	Pol-III
ENST00000516511.1	U6 spliceosomal RNA	Pol-III
ENST00000516514.1	U6 spliceosomal RNA	Pol-III
ENST00000516516.1	U6 spliceosomal RNA	Pol-III
ENST00000516518.2	U6 spliceosomal RNA	Pol-III
ENST00000516523.1	U6 spliceosomal RNA	Pol-III
ENST00000516524.1	U6 spliceosomal RNA	Pol-III
ENST00000516525.1	U6 spliceosomal RNA	Pol-III
ENST00000516526.1	U6 spliceosomal RNA	Pol-III
ENST00000516529.1	U6 spliceosomal RNA	Pol-III
ENST00000516530.1	U6 spliceosomal RNA	Pol-III
ENST00000516538.1	U6 spliceosomal RNA	Pol-III
ENST00000516539.1	U6 spliceosomal RNA	Pol-III
ENST00000516552.1	U6 spliceosomal RNA	Pol-III
ENST00000516553.1	U6 spliceosomal RNA	Pol-III
ENST00000516562.1	U6 spliceosomal RNA	Pol-III
ENST00000516564.1	U6 spliceosomal RNA	Pol-III
ENST00000516568.1	U6 spliceosomal RNA	Pol-III
ENST00000516570.2	U6 spliceosomal RNA	Pol-III
ENST00000516574.1	U6 spliceosomal RNA	Pol-III
ENST00000516576.1	U6 spliceosomal RNA	Pol-III
ENST00000516577.1	U6 spliceosomal RNA	Pol-III
ENST00000516582.1	U6 spliceosomal RNA	Pol-III
ENST00000516584.1	U6 spliceosomal RNA	Pol-III
ENST00000516586.2	U6 spliceosomal RNA	Pol-III
ENST00000516591.1	U6 spliceosomal RNA	Pol-III
ENST00000516602.1	U6 spliceosomal RNA	Pol-III
ENST00000516605.1	U6 spliceosomal RNA	Pol-III
ENST00000516606.1	U6 spliceosomal RNA	Pol-III
ENST00000516607.1	U6 spliceosomal RNA	Pol-III
ENST00000516612.1	U6 spliceosomal RNA	Pol-III
ENST00000516614.1	U6 spliceosomal RNA	Pol-III
ENST00000516622.1	U6 spliceosomal RNA	Pol-III
ENST00000516635.1	U6 spliceosomal RNA	Pol-III
ENST00000516637.1	U6 spliceosomal RNA	Pol-III
ENST00000516640.1	U6 spliceosomal RNA	Pol-III
ENST00000516643.1	U6 spliceosomal RNA	Pol-III
ENST00000516651.1	U6 spliceosomal RNA	Pol-III
ENST00000516653.1	U6 spliceosomal RNA	Pol-III
ENST00000516658.1	U6 spliceosomal RNA	Pol-III
ENST00000516661.1	U6 spliceosomal RNA	Pol-III
ENST00000516663.1	U6 spliceosomal RNA	Pol-III
ENST00000516665.1	U6 spliceosomal RNA	Pol-III
ENST00000516666.1	U6 spliceosomal RNA	Pol-III
ENST00000516671.1	U6 spliceosomal RNA	Pol-III
ENST00000516674.1	U6 spliceosomal RNA	Pol-III
ENST00000516680.1	U6 spliceosomal RNA	Pol-III
ENST00000516685.1	U6 spliceosomal RNA	Pol-III
ENST00000516689.1	U6 spliceosomal RNA	Pol-III
ENST00000516690.1	U6 spliceosomal RNA	Pol-III
ENST00000516694.1	U6 spliceosomal RNA	Pol-III
ENST00000516697.1	U6 spliceosomal RNA	Pol-III
ENST00000516706.2	U6 spliceosomal RNA	Pol-III
ENST00000516710.1	U6 spliceosomal RNA	Pol-III
ENST00000516714.1	U6 spliceosomal RNA	Pol-III
ENST00000516721.1	U6 spliceosomal RNA	Pol-III
ENST00000516724.1	U6 spliceosomal RNA	Pol-III
ENST00000516731.1	U6 spliceosomal RNA	Pol-III
ENST00000516735.1	U6 spliceosomal RNA	Pol-III
ENST00000516736.1	U6 spliceosomal RNA	Pol-III
ENST00000516740.1	U6 spliceosomal RNA	Pol-III
ENST00000516743.1	U6 spliceosomal RNA	Pol-III
ENST00000516745.1	U6 spliceosomal RNA	Pol-III
ENST00000516746.1	U6 spliceosomal RNA	Pol-III
ENST00000516747.1	U6 spliceosomal RNA	Pol-III
ENST00000516749.1	U6 spliceosomal RNA	Pol-III
ENST00000516753.1	U6 spliceosomal RNA	Pol-III
ENST00000516760.1	U6 spliceosomal RNA	Pol-III
ENST00000516769.1	U6 spliceosomal RNA	Pol-III
ENST00000516772.1	U6 spliceosomal RNA	Pol-III
ENST00000516784.1	U6 spliceosomal RNA	Pol-III
ENST00000516785.1	U6 spliceosomal RNA	Pol-III
ENST00000516790.1	U6 spliceosomal RNA	Pol-III
ENST00000516797.1	U6 spliceosomal RNA	Pol-III
ENST00000516799.1	U6 spliceosomal RNA	Pol-III
ENST00000516802.1	U6 spliceosomal RNA	Pol-III
ENST00000516805.1	U6 spliceosomal RNA	Pol-III
ENST00000516810.1	U6 spliceosomal RNA	Pol-III
ENST00000516813.1	U6 spliceosomal RNA	Pol-III
ENST00000516817.1	U6 spliceosomal RNA	Pol-III
ENST00000516818.1	U6 spliceosomal RNA	Pol-III
ENST00000516819.2	U6 spliceosomal RNA	Pol-III
ENST00000516827.1	U6 spliceosomal RNA	Pol-III
ENST00000516832.2	U6 spliceosomal RNA	Pol-III
ENST00000516834.1	U6 spliceosomal RNA	Pol-III
ENST00000516842.1	U6 spliceosomal RNA	Pol-III
ENST00000516849.1	U6 spliceosomal RNA	Pol-III
ENST00000516850.1	U6 spliceosomal RNA	Pol-III
ENST00000516852.1	U6 spliceosomal RNA	Pol-III
ENST00000516876.1	U6 spliceosomal RNA	Pol-III
ENST00000516877.1	U6 spliceosomal RNA	Pol-III
ENST00000516879.1	U6 spliceosomal RNA	Pol-III
ENST00000516896.1	U6 spliceosomal RNA	Pol-III
ENST00000516901.1	U6 spliceosomal RNA	Pol-III
ENST00000516904.1	U6 spliceosomal RNA	Pol-III
ENST00000516908.1	U6 spliceosomal RNA	Pol-III
ENST00000516909.1	U6 spliceosomal RNA	Pol-III
ENST00000516911.1	U6 spliceosomal RNA	Pol-III
ENST00000516912.1	U6 spliceosomal RNA	Pol-III
ENST00000516914.2	U6 spliceosomal RNA	Pol-III
ENST00000516916.1	U6 spliceosomal RNA	Pol-III
ENST00000516920.1	U6 spliceosomal RNA	Pol-III
ENST00000516925.1	U6 spliceosomal RNA	Pol-III
ENST00000516926.1	U6 spliceosomal RNA	Pol-III
ENST00000516934.1	U6 spliceosomal RNA	Pol-III
ENST00000516937.1	U6 spliceosomal RNA	Pol-III
ENST00000516942.1	U6 spliceosomal RNA	Pol-III
ENST00000516943.1	U6 spliceosomal RNA	Pol-III
ENST00000516946.1	U6 spliceosomal RNA	Pol-III
ENST00000516947.1	U6 spliceosomal RNA	Pol-III
ENST00000516949.1	U6 spliceosomal RNA	Pol-III
ENST00000516955.1	U6 spliceosomal RNA	Pol-III
ENST00000516957.1	U6 spliceosomal RNA	Pol-III
ENST00000516958.1	U6 spliceosomal RNA	Pol-III
ENST00000516959.1	U6 spliceosomal RNA	Pol-III
ENST00000516960.1	U6 spliceosomal RNA	Pol-III
ENST00000516963.1	U6 spliceosomal RNA	Pol-III
ENST00000516970.1	U6 spliceosomal RNA	Pol-III
ENST00000516973.1	U6 spliceosomal RNA	Pol-III
ENST00000516974.1	U6 spliceosomal RNA	Pol-III
ENST00000516986.1	U6 spliceosomal RNA	Pol-III
ENST00000516995.1	U6 spliceosomal RNA	Pol-III
ENST00000516998.1	U6 spliceosomal RNA	Pol-III
ENST00000517001.1	U6 spliceosomal RNA	Pol-III
ENST00000517006.1	U6 spliceosomal RNA	Pol-III
ENST00000517012.1	U6 spliceosomal RNA	Pol-III
ENST00000517014.1	U6 spliceosomal RNA	Pol-III
ENST00000517023.1	U6 spliceosomal RNA	Pol-III
ENST00000517027.1	U6 spliceosomal RNA	Pol-III
ENST00000517030.1	U6 spliceosomal RNA	Pol-III
ENST00000517048.1	U6 spliceosomal RNA	Pol-III
ENST00000517049.1	U6 spliceosomal RNA	Pol-III
ENST00000517050.1	U6 spliceosomal RNA	Pol-III
ENST00000517051.1	U6 spliceosomal RNA	Pol-III
ENST00000517052.1	U6 spliceosomal RNA	Pol-III
ENST00000517054.1	U6 spliceosomal RNA	Pol-III
ENST00000517058.1	U6 spliceosomal RNA	Pol-III
ENST00000517072.1	U6 spliceosomal RNA	Pol-III
ENST00000517073.1	U6 spliceosomal RNA	Pol-III
ENST00000517075.1	U6 spliceosomal RNA	Pol-III
ENST00000517078.1	U6 spliceosomal RNA	Pol-III
ENST00000517080.1	U6 spliceosomal RNA	Pol-III
ENST00000517081.1	U6 spliceosomal RNA	Pol-III
ENST00000517083.1	U6 spliceosomal RNA	Pol-III
ENST00000517088.1	U6 spliceosomal RNA	Pol-III
ENST00000517089.1	U6 spliceosomal RNA	Pol-III
ENST00000517091.1	U6 spliceosomal RNA	Pol-III
ENST00000517094.2	U6 spliceosomal RNA	Pol-III
ENST00000517099.1	U6 spliceosomal RNA	Pol-III
ENST00000517100.1	U6 spliceosomal RNA	Pol-III
ENST00000517104.1	U6 spliceosomal RNA	Pol-III
ENST00000517105.1	U6 spliceosomal RNA	Pol-III
ENST00000517107.1	U6 spliceosomal RNA	Pol-III
ENST00000517113.1	U6 spliceosomal RNA	Pol-III
ENST00000517119.1	U6 spliceosomal RNA	Pol-III
ENST00000517120.1	U6 spliceosomal RNA	Pol-III
ENST00000517121.1	U6 spliceosomal RNA	Pol-III
ENST00000517122.1	U6 spliceosomal RNA	Pol-III
ENST00000517124.1	U6 spliceosomal RNA	Pol-III
ENST00000517126.1	U6 spliceosomal RNA	Pol-III
ENST00000517128.1	U6 spliceosomal RNA	Pol-III
ENST00000517134.1	U6 spliceosomal RNA	Pol-III
ENST00000517135.1	U6 spliceosomal RNA	Pol-III
ENST00000517139.1	U6 spliceosomal RNA	Pol-III
ENST00000517143.1	U6 spliceosomal RNA	Pol-III
ENST00000517144.1	U6 spliceosomal RNA	Pol-III
ENST00000517153.1	U6 spliceosomal RNA	Pol-III
ENST00000517162.1	U6 spliceosomal RNA	Pol-III
ENST00000517164.1	U6 spliceosomal RNA	Pol-III
ENST00000517170.1	U6 spliceosomal RNA	Pol-III
ENST00000517171.1	U6 spliceosomal RNA	Pol-III
ENST00000517175.1	U6 spliceosomal RNA	Pol-III
ENST00000517179.1	U6 spliceosomal RNA	Pol-III
ENST00000517182.1	U6 spliceosomal RNA	Pol-III
ENST00000517185.1	U6 spliceosomal RNA	Pol-III
ENST00000517186.1	U6 spliceosomal RNA	Pol-III
ENST00000517187.1	U6 spliceosomal RNA	Pol-III
ENST00000517189.1	U6 spliceosomal RNA	Pol-III
ENST00000517194.1	U6 spliceosomal RNA	Pol-III
ENST00000517196.1	U6 spliceosomal RNA	Pol-III
ENST00000517212.1	U6 spliceosomal RNA	Pol-III
ENST00000517213.1	U6 spliceosomal RNA	Pol-III
ENST00000517215.1	U6 spliceosomal RNA	Pol-III
ENST00000517217.1	U6 spliceosomal RNA	Pol-III
ENST00000517223.1	U6 spliceosomal RNA	Pol-III
ENST00000517229.1	U6 spliceosomal RNA	Pol-III
ENST00000517254.1	U6 spliceosomal RNA	Pol-III
ENST00000517255.1	U6 spliceosomal RNA	Pol-III
ENST00000517257.1	U6 spliceosomal RNA	Pol-III
ENST00000517261.1	U6 spliceosomal RNA	Pol-III
ENST00000517265.1	U6 spliceosomal RNA	Pol-III
ENST00000517269.1	U6 spliceosomal RNA	Pol-III
ENST00000517275.3	U6 spliceosomal RNA	Pol-III
ENST00000517277.1	U6 spliceosomal RNA	Pol-III
ENST00000517278.1	U6 spliceosomal RNA	Pol-III
ENST00000519081.1	U6 spliceosomal RNA	Pol-III
ENST00000521915.1	U6 spliceosomal RNA	Pol-III
ENST00000572460.1	U6 spliceosomal RNA	Pol-III
ENST00000574861.1	U6 spliceosomal RNA	Pol-III
ENST00000575271.1	U6 spliceosomal RNA	Pol-III
ENST00000577293.1	U6 spliceosomal RNA	Pol-III
ENST00000577780.1	U6 spliceosomal RNA	Pol-III
ENST00000578062.1	U6 spliceosomal RNA	Pol-III
ENST00000578738.1	U6 spliceosomal RNA	Pol-III
ENST00000579440.1	U6 spliceosomal RNA	Pol-III
ENST00000579550.1	U6 spliceosomal RNA	Pol-III
ENST00000579598.1	U6 spliceosomal RNA	Pol-III
ENST00000579614.1	U6 spliceosomal RNA	Pol-III
ENST00000580354.1	U6 spliceosomal RNA	Pol-III
ENST00000580668.1	U6 spliceosomal RNA	Pol-III
ENST00000581308.1	U6 spliceosomal RNA	Pol-III
ENST00000581728.1	U6 spliceosomal RNA	Pol-III
ENST00000581785.1	U6 spliceosomal RNA	Pol-III
ENST00000581846.1	U6 spliceosomal RNA	Pol-III
ENST00000581939.1	U6 spliceosomal RNA	Pol-III
ENST00000582197.1	U6 spliceosomal RNA	Pol-III
ENST00000582932.1	U6 spliceosomal RNA	Pol-III
ENST00000583133.1	U6 spliceosomal RNA	Pol-III
ENST00000583231.1	U6 spliceosomal RNA	Pol-III
ENST00000583333.1	U6 spliceosomal RNA	Pol-III
ENST00000583433.1	U6 spliceosomal RNA	Pol-III
ENST00000583551.1	U6 spliceosomal RNA	Pol-III
ENST00000583652.1	U6 spliceosomal RNA	Pol-III
ENST00000584076.1	U6 spliceosomal RNA	Pol-III
ENST00000584237.1	U6 spliceosomal RNA	Pol-III
ENST00000584269.1	U6 spliceosomal RNA	Pol-III
ENST00000584333.1	U6 spliceosomal RNA	Pol-III
ENST00000584993.1	U6 spliceosomal RNA	Pol-III
ENST00000585053.1	U6 spliceosomal RNA	Pol-III
ENST00000605893.1	U6 spliceosomal RNA	Pol-III
ENST00000605989.1	U6 spliceosomal RNA	Pol-III
ENST00000606352.1	U6 spliceosomal RNA	Pol-III
ENST00000606519.1	U6 spliceosomal RNA	Pol-III
ENST00000606534.1	U6 spliceosomal RNA	Pol-III
ENST00000606623.1	U6 spliceosomal RNA	Pol-III
ENST00000606801.1	U6 spliceosomal RNA	Pol-III
ENST00000607561.1	U6 spliceosomal RNA	Pol-III
ENST00000607728.1	U6 spliceosomal RNA	Pol-III
ENST00000607737.1	U6 spliceosomal RNA	Pol-III
ENST00000607774.1	U6 spliceosomal RNA	Pol-III
ENST00000610299.1	U6 spliceosomal RNA	Pol-III
ENST00000610366.1	U6 spliceosomal RNA	Pol-III
ENST00000610695.1	U6 spliceosomal RNA	Pol-III
ENST00000610860.1	U6 spliceosomal RNA	Pol-III
ENST00000610987.1	U6 spliceosomal RNA	Pol-III
ENST00000611089.1	U6 spliceosomal RNA	Pol-III
ENST00000611790.1	U6 spliceosomal RNA	Pol-III
ENST00000612037.1	U6 spliceosomal RNA	Pol-III
ENST00000612108.1	U6 spliceosomal RNA	Pol-III
ENST00000612176.1	U6 spliceosomal RNA	Pol-III
ENST00000612197.1	U6 spliceosomal RNA	Pol-III
ENST00000612283.1	U6 spliceosomal RNA	Pol-III
ENST00000612506.1	U6 spliceosomal RNA	Pol-III
ENST00000612508.1	U6 spliceosomal RNA	Pol-III
ENST00000612550.1	U6 spliceosomal RNA	Pol-III
ENST00000612589.1	U6 spliceosomal RNA	Pol-III
ENST00000612763.1	U6 spliceosomal RNA	Pol-III
ENST00000613107.1	U6 spliceosomal RNA	Pol-III
ENST00000613320.1	U6 spliceosomal RNA	Pol-III
ENST00000613373.1	U6 spliceosomal RNA	Pol-III
ENST00000613402.1	U6 spliceosomal RNA	Pol-III
ENST00000613601.1	U6 spliceosomal RNA	Pol-III
ENST00000613955.1	U6 spliceosomal RNA	Pol-III
ENST00000613962.1	U6 spliceosomal RNA	Pol-III
ENST00000614007.1	U6 spliceosomal RNA	Pol-III
ENST00000614042.1	U6 spliceosomal RNA	Pol-III
ENST00000614520.1	U6 spliceosomal RNA	Pol-III
ENST00000614682.1	U6 spliceosomal RNA	Pol-III
ENST00000614719.1	U6 spliceosomal RNA	Pol-III
ENST00000615132.1	U6 spliceosomal RNA	Pol-III
ENST00000615218.1	U6 spliceosomal RNA	Pol-III
ENST00000615356.1	U6 spliceosomal RNA	Pol-III
ENST00000615657.1	U6 spliceosomal RNA	Pol-III
ENST00000615686.1	U6 spliceosomal RNA	Pol-III
ENST00000615903.1	U6 spliceosomal RNA	Pol-III
ENST00000616185.1	U6 spliceosomal RNA	Pol-III
ENST00000616468.1	U6 spliceosomal RNA	Pol-III
ENST00000616830.1	U6 spliceosomal RNA	Pol-III
ENST00000617512.1	U6 spliceosomal RNA	Pol-III
ENST00000617976.1	U6 spliceosomal RNA	Pol-III
ENST00000617996.1	U6 spliceosomal RNA	Pol-III
ENST00000618289.1	U6 spliceosomal RNA	Pol-III
ENST00000618440.1	U6 spliceosomal RNA	Pol-III
ENST00000618470.1	U6 spliceosomal RNA	Pol-III
ENST00000618523.1	U6 spliceosomal RNA	Pol-III
ENST00000618624.1	U6 spliceosomal RNA	Pol-III
ENST00000618851.1	U6 spliceosomal RNA	Pol-III
ENST00000618997.1	U6 spliceosomal RNA	Pol-III
ENST00000619194.1	U6 spliceosomal RNA	Pol-III
ENST00000619328.1	U6 spliceosomal RNA	Pol-III
ENST00000619359.1	U6 spliceosomal RNA	Pol-III
ENST00000620122.1	U6 spliceosomal RNA	Pol-III
ENST00000620287.1	U6 spliceosomal RNA	Pol-III
ENST00000620701.1	U6 spliceosomal RNA	Pol-III
ENST00000620756.1	U6 spliceosomal RNA	Pol-III
ENST00000620928.1	U6 spliceosomal RNA	Pol-III
ENST00000620968.1	U6 spliceosomal RNA	Pol-III
ENST00000621035.1	U6 spliceosomal RNA	Pol-III
ENST00000621236.1	U6 spliceosomal RNA	Pol-III
ENST00000621250.1	U6 spliceosomal RNA	Pol-III
ENST00000621753.1	U6 spliceosomal RNA	Pol-III
ENST00000621869.1	U6 spliceosomal RNA	Pol-III
ENST00000621978.1	U6 spliceosomal RNA	Pol-III
ENST00000622103.1	U6 spliceosomal RNA	Pol-III
ENST00000622163.1	U6 spliceosomal RNA	Pol-III
ENST00000622286.1	U6 spliceosomal RNA	Pol-III
ENST00000622329.1	U6 spliceosomal RNA	Pol-III
ENST00000622384.1	U6 spliceosomal RNA	Pol-III
ENST00000622869.1	U6 spliceosomal RNA	Pol-III
ENST00000629966.1	U6 spliceosomal RNA	Pol-III
ENST00000631612.1	U6 spliceosomal RNA	Pol-III
ENST00000632886.1	U6 spliceosomal RNA	Pol-III
ENST00000633131.1	U6 spliceosomal RNA	Pol-III
ENST00000633683.1	U6 spliceosomal RNA	Pol-III
ENST00000634388.1	U6 spliceosomal RNA	Pol-III
ENST00000635512.1	U6 spliceosomal RNA	Pol-III
ENST00000635778.1	U6 spliceosomal RNA	Pol-III
ENST00000636045.1	U6 spliceosomal RNA	Pol-III
ENST00000636093.1	U6 spliceosomal RNA	Pol-III
ENST00000636230.1	U6 spliceosomal RNA	Pol-III
ENST00000636360.1	U6 spliceosomal RNA	Pol-III
ENST00000636407.1	U6 spliceosomal RNA	Pol-III
ENST00000636425.1	U6 spliceosomal RNA	Pol-III
ENST00000636464.1	U6 spliceosomal RNA	Pol-III
ENST00000636720.1	U6 spliceosomal RNA	Pol-III
ENST00000636749.1	U6 spliceosomal RNA	Pol-III
ENST00000636829.1	U6 spliceosomal RNA	Pol-III
ENST00000636904.1	U6 spliceosomal RNA	Pol-III
ENST00000636931.1	U6 spliceosomal RNA	Pol-III
ENST00000637085.1	U6 spliceosomal RNA	Pol-III
ENST00000637108.1	U6 spliceosomal RNA	Pol-III
ENST00000637157.1	U6 spliceosomal RNA	Pol-III
ENST00000637379.1	U6 spliceosomal RNA	Pol-III
ENST00000637524.1	U6 spliceosomal RNA	Pol-III
ENST00000637707.1	U6 spliceosomal RNA	Pol-III
ENST00000637725.1	U6 spliceosomal RNA	Pol-III
ENST00000637737.1	U6 spliceosomal RNA	Pol-III
ENST00000637761.1	U6 spliceosomal RNA	Pol-III
ENST00000637764.1	U6 spliceosomal RNA	Pol-III
ENST00000637979.1	U6 spliceosomal RNA	Pol-III
ENST00000638196.1	U6 spliceosomal RNA	Pol-III
ENST00000638544.1	U6 spliceosomal RNA	Pol-III
ENST00000639545.2	U6 spliceosomal RNA	Pol-III
ENST00000640459.1	U6 spliceosomal RNA	Pol-III
ENST00000640667.1	U6 spliceosomal RNA	Pol-III
ENST00000640936.1	U6 spliceosomal RNA	Pol-III
ENST00000640947.1	U6 spliceosomal RNA	Pol-III
ENST00000642234.1	U6 spliceosomal RNA	Pol-III
ENST00000642702.1	U6 spliceosomal RNA	Pol-III
ENST00000642786.1	U6 spliceosomal RNA	Pol-III
ENST00000644344.1	U6 spliceosomal RNA	Pol-III
ENST00000644437.1	U6 spliceosomal RNA	Pol-III
ENST00000645166.1	U6 spliceosomal RNA	Pol-III
ENST00000645581.1	U6 spliceosomal RNA	Pol-III
ENST00000645734.1	U6 spliceosomal RNA	Pol-III
ENST00000645852.1	U6 spliceosomal RNA	Pol-III
ENST00000646220.1	U6 spliceosomal RNA	Pol-III
ENST00000646237.1	U6 spliceosomal RNA	Pol-III
ENST00000646555.1	U6 spliceosomal RNA	Pol-III
ENST00000672458.1	U6 spliceosomal RNA	Pol-III
ENST00000672529.1	U6 spliceosomal RNA	Pol-III
ENST00000673263.1	U6 spliceosomal RNA	Pol-III
NR_023344.1	U6atac spliceosomal RNA	Pol-III
ENST00000387446.1	U6atac spliceosomal RNA	Pol-III
ENST00000387943.1	U6atac spliceosomal RNA	Pol-III
ENST00000387974.1	U6atac spliceosomal RNA	Pol-III
ENST00000388104.1	U6atac spliceosomal RNA	Pol-III
ENST00000388106.1	U6atac spliceosomal RNA	Pol-III
ENST00000408088.1	U6atac spliceosomal RNA	Pol-III
ENST00000408096.1	U6atac spliceosomal RNA	Pol-III
ENST00000408111.1	U6atac spliceosomal RNA	Pol-III
ENST00000408119.1	U6atac spliceosomal RNA	Pol-III
ENST00000408132.1	U6atac spliceosomal RNA	Pol-III
ENST00000408187.1	U6atac spliceosomal RNA	Pol-III
ENST00000408279.1	U6atac spliceosomal RNA	Pol-III
ENST00000408289.1	U6atac spliceosomal RNA	Pol-III
ENST00000408328.1	U6atac spliceosomal RNA	Pol-III
ENST00000408413.1	U6atac spliceosomal RNA	Pol-III
ENST00000408436.1	U6atac spliceosomal RNA	Pol-III
ENST00000408448.1	U6atac spliceosomal RNA	Pol-III
ENST00000408460.1	U6atac spliceosomal RNA	Pol-III
ENST00000408513.1	U6atac spliceosomal RNA	Pol-III
ENST00000408541.1	U6atac spliceosomal RNA	Pol-III
ENST00000408580.1	U6atac spliceosomal RNA	Pol-III
ENST00000408591.1	U6atac spliceosomal RNA	Pol-III
ENST00000408600.1	U6atac spliceosomal RNA	Pol-III
ENST00000408635.1	U6atac spliceosomal RNA	Pol-III
ENST00000408637.1	U6atac spliceosomal RNA	Pol-III
ENST00000408644.1	U6atac spliceosomal RNA	Pol-III
ENST00000408647.1	U6atac spliceosomal RNA	Pol-III
ENST00000408656.1	U6atac spliceosomal RNA	Pol-III
ENST00000408798.1	U6atac spliceosomal RNA	Pol-III
ENST00000408879.1	U6atac spliceosomal RNA	Pol-III
ENST00000459249.1	U6atac spliceosomal RNA	Pol-III
ENST00000516026.1	U6atac spliceosomal RNA	Pol-III
ENST00000516074.1	U6atac spliceosomal RNA	Pol-III
ENST00000516152.1	U6atac spliceosomal RNA	Pol-III
ENST00000516210.1	U6atac spliceosomal RNA	Pol-III
ENST00000516218.1	U6atac spliceosomal RNA	Pol-III
ENST00000516309.1	U6atac spliceosomal RNA	Pol-III
ENST00000516542.1	U6atac spliceosomal RNA	Pol-III
ENST00000516794.1	U6atac spliceosomal RNA	Pol-III
ENST00000516811.1	U6atac spliceosomal RNA	Pol-III
ENST00000516875.1	U6atac spliceosomal RNA	Pol-III
ENST00000616025.1	U6atac spliceosomal RNA	Pol-III
NR_023317.1	U7 spliceosomal RNA	Pol-II
ENST00000458743.1	U7 spliceosomal RNA	Pol-II
ENST00000458744.1	U7 spliceosomal RNA	Pol-II
ENST00000458752.1	U7 spliceosomal RNA	Pol-II
ENST00000458760.1	U7 spliceosomal RNA	Pol-II
ENST00000458792.1	U7 spliceosomal RNA	Pol-II
ENST00000458793.1	U7 spliceosomal RNA	Pol-II
ENST00000458818.1	U7 spliceosomal RNA	Pol-II
ENST00000458819.1	U7 spliceosomal RNA	Pol-II
ENST00000458830.1	U7 spliceosomal RNA	Pol-II
ENST00000458836.1	U7 spliceosomal RNA	Pol-II
ENST00000458845.1	U7 spliceosomal RNA	Pol-II
ENST00000458851.1	U7 spliceosomal RNA	Pol-II
ENST00000458856.1	U7 spliceosomal RNA	Pol-II
ENST00000458864.1	U7 spliceosomal RNA	Pol-II
ENST00000458867.1	U7 spliceosomal RNA	Pol-II
ENST00000458875.1	U7 spliceosomal RNA	Pol-II
ENST00000458903.1	U7 spliceosomal RNA	Pol-II
ENST00000458919.1	U7 spliceosomal RNA	Pol-II
ENST00000458948.1	U7 spliceosomal RNA	Pol-II
ENST00000458980.1	U7 spliceosomal RNA	Pol-II
ENST00000458982.1	U7 spliceosomal RNA	Pol-II
ENST00000458985.1	U7 spliceosomal RNA	Pol-II
ENST00000458997.1	U7 spliceosomal RNA	Pol-II
ENST00000459003.1	U7 spliceosomal RNA	Pol-II
ENST00000459009.1	U7 spliceosomal RNA	Pol-II
ENST00000459020.1	U7 spliceosomal RNA	Pol-II
ENST00000459033.1	U7 spliceosomal RNA	Pol-II
ENST00000459053.1	U7 spliceosomal RNA	Pol-II
ENST00000459054.1	U7 spliceosomal RNA	Pol-II
ENST00000459066.1	U7 spliceosomal RNA	Pol-II
ENST00000459101.1	U7 spliceosomal RNA	Pol-II
ENST00000459104.1	U7 spliceosomal RNA	Pol-II
ENST00000459118.1	U7 spliceosomal RNA	Pol-II
ENST00000459120.1	U7 spliceosomal RNA	Pol-II
ENST00000459121.1	U7 spliceosomal RNA	Pol-II
ENST00000459135.1	U7 spliceosomal RNA	Pol-II
ENST00000459160.1	U7 spliceosomal RNA	Pol-II
ENST00000459175.1	U7 spliceosomal RNA	Pol-II
ENST00000459188.1	U7 spliceosomal RNA	Pol-II
ENST00000459215.1	U7 spliceosomal RNA	Pol-II
ENST00000459216.1	U7 spliceosomal RNA	Pol-II
ENST00000459221.1	U7 spliceosomal RNA	Pol-II
ENST00000459222.1	U7 spliceosomal RNA	Pol-II
ENST00000459236.1	U7 spliceosomal RNA	Pol-II
ENST00000459238.1	U7 spliceosomal RNA	Pol-II
ENST00000459240.1	U7 spliceosomal RNA	Pol-II
ENST00000459241.1	U7 spliceosomal RNA	Pol-II
ENST00000459273.1	U7 spliceosomal RNA	Pol-II
ENST00000459276.2	U7 spliceosomal RNA	Pol-II
ENST00000459279.1	U7 spliceosomal RNA	Pol-II
ENST00000459281.1	U7 spliceosomal RNA	Pol-II
ENST00000459284.1	U7 spliceosomal RNA	Pol-II
ENST00000459303.1	U7 spliceosomal RNA	Pol-II
ENST00000459304.1	U7 spliceosomal RNA	Pol-II
ENST00000459331.1	U7 spliceosomal RNA	Pol-II
ENST00000459334.1	U7 spliceosomal RNA	Pol-II
[truncated: 1,222 more rows]
