# Supplementary material for: Deep sequencing of short capped RNAs reveals novel families of noncoding RNAs
Source: Genome Res. 2022 Sep;32(9):1727–35. doi: 10.1101/gr.276647.122 (PMC9528987; doi:10.1101/gr.276647.122)
Supplement: Supplemental Material [file supp_gr.276647.122_Supplemental_Table_S2.xlsx]

## Sheet: README
Sheet TableS2 contains two tables with the RNA concentration in ng/μl, the RNA volume in μl, the RNA amount in μg, the RNA Integrity Number (RIN), the 5' barcode sequence and 3' index sequence used for ibrary preparation, and the number of paired reads obtained for each of the samples of the short capped RNA paired-end libraries. The top table lists the 18 samples of the time course of THP-1 cell…

## Sheet: TableS2
		RNA				cDNA library
PMA timecourse, time point	Replicate	Concentration (ng/μl)	Volume (μl)	Amount (μg)	Integrity Number (RIN)	5' barcode	3' index	Number of paired reads
0 hr	1	200	25	5	9.2	CAC	ATCACG	311097
	2	189	25	4.73	9.3	AGT	ATCACG	311192
	3	187	25	4.68	9.5	GCG	ATCACG	304059
1 hr	1	85	25	2.13	9.7	CAC	CGATGT	497953
	2	101	25	2.53	9.5	AGT	CGATGT	417687
	3	86	25	2.15	2.2	GCG	CGATGT	567353
4 hr	1	64	25	1.6	10	CAC	TTAGGC	408071
	2	99	25	2.48	10	AGT	TTAGGC	181007
	3	85	25	2.13	10	GCG	TTAGGC	432629
12 hr	1	155	25	3.88	9.9	CAC	TGACCA	526797
	2	151	25	3.78	9.8	AGT	TGACCA	259555
	3	153	25	3.83	9.8	GCG	TGACCA	267750
24 hr	1	175	25	4.38	9.9	CAC	ACAGTG	387899
	2	186	25	4.65	10	AGT	ACAGTG	268074
	3	161	25	4.03	9.9	GCG	ACAGTG	137045
96 hr	1	300	25	7.5	9.9	CAC	GCCAAT	544532
	2	405	25	10.13	10	AGT	GCCAAT	158561
	3	348	25	8.7	10	GCG	GCCAAT	264786
		RNA				cDNA library
Transfection condition		Concentration (ng/μl)	Volume (μl)	Amount (μg)	Integrity Number (RIN)	5' barcode	3' index	Number of paired reads
Untreated cells		622	60	37.32	9.7	TAC	GATCAG	258725
						GCT	GATCAG	4114	Protocol negative control library prepared without 3' adapter
Lipofectamine only		659	60	39.54	9.5	ATG	GATCAG	135468
Negative Control A		290.7	28	8.14	-	TAC	CGATGT	203011
		270.5	26	7.03	-	GCT	CGATGT	116032
		614	60	36.84	9.8	ATG	ACTTGA	140126
		697	60	41.82	9.5	TAC	ACTTGA	191037
		625	60	37.5	9.7	GCT	ACTTGA	295903
		235.7	28	6.6	-	ATG	CGATGT	135496
ASO Knockdown		286.6	28	8.02	-	ATG	TAGCTT	160097
		205.3	28	5.75	-	TAC	TAGCTT	356109
		290.4	28	8.13	-	GCT	TAGCTT	82761
		263.4	28	7.38	-	ATG	ATCACG	86296
		344.5	28	9.65	-	TAC	ATCACG	97114
		237	28	6.64	-	GCT	ATCACG	333210
		93	60	5.58	9.4	ATG	CAGATC	166030
		174	60	10.44	9.6	TAC	CAGATC	291285
		166	60	9.96	9.4	GCT	CAGATC	227677
