# Supplementary material for: Deep sequencing of short capped RNAs reveals novel families of noncoding RNAs
Source: Genome Res. 2022 Sep;32(9):1727–35. doi: 10.1101/gr.276647.122 (PMC9528987; doi:10.1101/gr.276647.122)
Supplement: Supplemental Material [file supp_gr.276647.122_Supplemental_Table_S3.xlsx]

## Sheet: README
Sheet TableS3 shows the number of sequenced reads in each of the functional categories listed in column A, for each of the short capped RNA paired-end and single-end libraries, as well as for the long capped RNA (CAGE) libraries. The RNA size (short or long), library type (paired-end or single-end), library ID (consisting of time point and replicate number), and time point are shown for each samp…

## Sheet: TableS3
Dataset	MiSeq	MiSeq	MiSeq	MiSeq	MiSeq	MiSeq	MiSeq	MiSeq	MiSeq	MiSeq	MiSeq	MiSeq	MiSeq	MiSeq	MiSeq	MiSeq	MiSeq	MiSeq	HiSeq	HiSeq	HiSeq	HiSeq	HiSeq	HiSeq	HiSeq	HiSeq	HiSeq	HiSeq	HiSeq	HiSeq	HiSeq	HiSeq	HiSeq	HiSeq	HiSeq	CAGE	CAGE	CAGE	CAGE	CAGE	CAGE	CAGE	CAGE	CAGE	CAGE	CAGE	CAGE	CAGE	CAGE
RNA size	Short	Short	Short	Short	Short	Short	Short	Short	Short	Short	Short	Short	Short	Short	Short	Short	Short	Short	Short	Short	Short	Short	Short	Short	Short	Short	Short	Short	Short	Short	Short	Short	Short	Short	Long	Long	Long	Long	Long	Long	Long	Long	Long	Long	Long	Long	Long	Long	Long
Single-/paired-end	Paired-end	Paired-end	Paired-end	Paired-end	Paired-end	Paired-end	Paired-end	Paired-end	Paired-end	Paired-end	Paired-end	Paired-end	Paired-end	Paired-end	Paired-end	Paired-end	Paired-end	Paired-end	Single-end	Single-end	Single-end	Single-end	Single-end	Single-end	Single-end	Single-end	Single-end	Single-end	Single-end	Single-end	Single-end	Single-end	Single-end	Single-end	Single-end	Single-end	Single-end	Single-end	Single-end	Single-end	Single-end	Single-end	Single-end	Single-end	Single-end	Single-end	Single-end	Single-end	Single-end
Library	t00_r1	t00_r2	t00_r3	t01_r1	t01_r2	t01_r3	t04_r1	t04_r2	t04_r3	t12_r1	t12_r2	t12_r3	t24_r1	t24_r2	t24_r3	t96_r1	t96_r2	t96_r3	t00_r1	t00_r2	t00_r3	t01_r1	t01_r2	t04_r1	t04_r2	t04_r3	t12_r1	t12_r2	t12_r3	t24_r1	t24_r2	t24_r3	t96_r1	t96_r2	t96_r3	00_hr_A	00_hr_C	00_hr_G	00_hr_H	01_hr_A	01_hr_C	01_hr_G	04_hr_C	04_hr_E	12_hr_A	12_hr_C	24_hr_C	24_hr_E	96_hr_A
Time point	0 hr	0 hr	0 hr	1 hr	1 hr	1 hr	4 hr	4 hr	4 hr	12 hr	12 hr	12 hr	24 hr	24 hr	24 hr	96 hr	96 hr	96 hr	0 hr	0 hr	0 hr	1 hr	1 hr	4 hr	4 hr	4 hr	12 hr	12 hr	12 hr	24 hr	24 hr	24 hr	96 hr	96 hr	96 hr	0 hr	0 hr	0 hr	0 hr	1 hr	1 hr	1 hr	4 hr	4 hr	12 hr	12 hr	24 hr	24 hr	96 hr
unmapped	9723	6375	5199	13493	10509	7325	10609	4931	4328	12634	6198	4834	10019	5158	1735	13426	4805	3562	610156	627773	413661	667809	713784	906429	936002	471692	653845	665090	484788	756075	859652	1078346	1591556	1225841	751196	601505	1294317	1007297	1065140	823407	741796	3255310	661516	761956	563897	861290	1840584	375433	1351224
chrM	536	631	522	796	958	1283	500	456	585	595	521	640	605	608	222	1091	782	715	76410	72221	79008	74251	97688	67527	109849	75148	68601	83567	88961	112667	122958	182762	220324	244549	159703	67219	83643	257617	179340	221780	228004	935295	223205	129727	93544	176834	263453	122214	288109
rRNA	37097	71067	40771	65412	74556	91118	43806	40284	53499	63546	46830	35191	40019	63877	22842	83395	48350	57653	2928316	4919786	3478599	3618609	5583511	2292627	4842627	4104580	2744733	5871680	4371988	2680711	4176219	1438366	1076718	6197103	1002788	231738	242138	672595	443331	537066	643666	2368915	634810	557148	326653	448815	504515	298109	355547
Pol-II short RNA	253464	216911	247388	401798	307919	448774	343428	124029	364861	439071	195202	218515	329671	185967	107955	433591	93160	194592	38069208	27755661	29944799	43230076	24973083	20899382	19869187	35662966	39021166	26913345	32106632	29291886	17154122	6518259	4528516	13616854	2397508	11006	19470	20552	34067	33034	59594	66991	29969	32199	25210	29660	31310	15777	38458
Pol-III short RNA	2558	6389	2198	5998	6274	7853	2713	2616	3889	3989	2481	2352	2337	4696	1717	6542	3596	3708	381321	427004	335867	502548	594869	194252	597560	282957	273167	615067	349328	565800	610638	200071	89080	858552	68884	4416	5536	19292	48962	13755	17047	69532	14748	15310	5171	10405	31826	35540	14645
intronic short RNA	778	1191	564	1061	1636	906	881	685	740	1287	888	587	909	1239	512	1246	647	591	164026	191155	114561	161364	197247	173888	231342	123388	191851	221854	143170	235510	231153	71280	67708	286437	36828	668	775	3469	6491	1769	1390	11630	1823	2499	673	1670	7142	7149	2138
short RNA precursor	457	847	528	878	1582	985	369	445	523	462	477	413	480	719	165	512	385	327	151050	200306	127178	170073	232316	188834	257577	145367	141877	206168	148960	155783	228685	266262	286653	278887	167079	23804	24089	67697	39954	38861	31614	150357	46862	51110	18786	33740	41424	28316	17613
histone	221	422	229	322	413	294	169	232	180	129	105	100	36	63	17	136	91	71	33097	49241	29462	36612	51808	61760	60515	31934	20031	29751	20537	9476	14493	16280	41993	50157	23296	187437	165439	358515	288734	397182	416908	793919	439521	470293	139660	208703	64499	47302	76922
sense	5682	6443	6012	7179	12191	7545	5027	6566	3404	4413	6065	4535	3160	4747	1581	3917	6071	3016	3546439	5309398	3016210	3221464	6404374	8174353	10612648	3724517	3959655	6526099	4322198	6637060	12453918	17267717	24838237	19869098	14905453	4548015	5746869	14149295	5409692	8490907	6260998	25394774	12252139	7255404	4206816	9029807	8335490	5833895	5311949
antisense	27	43	27	54	84	42	30	37	31	30	34	19	30	40	8	30	30	36	18956	23100	16857	15227	24763	17947	25783	12669	14145	20217	15420	18766	30752	36189	54234	55787	42022	41114	37355	71681	104925	91491	81748	327201	52802	50276	34601	89905	73251	35713	74503
FANTOM5_enhancer	136	251	138	280	427	309	127	215	156	164	209	140	180	305	75	167	177	149	52081	67581	46040	61214	100609	85493	123969	55957	74860	99181	72719	86818	142606	166595	225043	197821	116644	17883	17222	50321	21683	47385	43429	108893	64915	41912	26098	52246	70862	35893	45889
roadmap_enhancer	250	344	265	368	642	559	237	276	258	292	344	244	261	394	128	289	271	232	192173	227194	168465	160183	273681	302166	363557	163660	199305	280711	243954	302921	475072	697368	942556	763357	567877	219113	260340	699444	363251	454987	320571	1422740	549352	373678	276978	688256	649613	445333	530574
roadmap_dyadic	112	189	153	205	335	237	109	157	105	130	137	134	134	186	65	126	147	95	222272	322332	211088	163131	319952	359721	458512	171135	188078	284396	190413	260388	508386	668708	963086	768046	491675	321109	389075	840074	339312	599559	464172	1607233	833430	460674	324592	756912	661139	407160	357207
novel_enhancer_CAGE	24	17	18	29	46	32	12	16	7	11	15	13	15	19	7	13	10	9	9465	10966	8572	8465	16366	13455	19519	8354	10595	15678	10064	15785	28470	33989	30970	27359	18778	2034	1821	5734	3618	5692	4640	16423	4469	3595	2160	4792	6590	3095	6377
novel_enhancer_HiSeq	15	30	18	35	47	44	22	26	27	18	24	13	19	31	10	28	19	12	4711	6276	4138	6170	8771	5132	7981	4430	4466	6355	4223	5195	7163	6329	7013	9059	4270	3051	3132	9993	3335	7947	6272	20776	11767	7453	4739	9632	11408	6762	7145
other_intergenic	17	42	29	45	68	47	32	36	36	26	25	20	24	25	6	23	20	18	44759	56584	42824	39434	67090	63639	87099	43002	46268	66506	55314	69121	108924	146938	209112	190545	122224	39213	45295	98239	54885	81740	56171	235240	91525	57624	47396	92971	86035	58952	68712
[truncated: 2 more columns]
