# Supplementary material for: Deep sequencing of short capped RNAs reveals novel families of noncoding RNAs
Source: Genome Res. 2022 Sep;32(9):1727–35. doi: 10.1101/gr.276647.122 (PMC9528987; doi:10.1101/gr.276647.122)
Supplement: Supplemental Material [file supp_gr.276647.122_Supplemental_Table_S4.xlsx]

## Sheet: README
Sheet TableS4 contains a table with the RNA volume in μl, the RNA amount in μg, the 5' barcode sequence and 3' index sequence used for ibrary preparation, and the number of single reads obtained for each of the samples of the short capped RNA single-end libraries. The RNA concentration and RNA Integrity Number (RIN) for these RNA samples are provided in Supplementary Table S2.

## Sheet: TableS4
		RNA		cDNA library
PMA timecourse, time point	Replicate	Volume (μl)	Amount (μg)	5' barcode	3' index	Number of reads
0 hr	1	20	4	CAC	ATCACG	46504440
	2	19.7	3.73	AGT	ATCACG	40266578
	3	19.7	3.68	GCG	ATCACG	38037329
1 hr	1	13.2	1.13	CAC	CGATGT	52136630
	2	15.1	1.53	AGT	CGATGT	39659912
Sample negative control library prepared with H₂O instead of an RNA sample				GCG	CGATGT	36158
4 hr	1	9.4	0.6	CAC	TTAGGC	33806605
	2	14.9	1.48	AGT	TTAGGC	38603727
	3	13.2	1.13	GCG	TTAGGC	45081756
12 hr	1	18.5	2.88	CAC	TGACCA	47612643
	2	18.4	2.78	AGT	TGACCA	41905665
	3	18.5	2.83	GCG	TGACCA	42628669
24 hr	1	19.3	3.38	CAC	ACAGTG	41203962
	2	19.6	3.65	AGT	ACAGTG	37153211
	3	18.8	3.03	GCG	ACAGTG	28795459
96 hr	1	21.7	6.5	CAC	GCCAAT	35172799
	2	22.5	9.13	AGT	GCCAAT	44639452
	3	22.1	7.7	GCG	GCCAAT	20876225
